1 **Title:** Sexual reproduction in the fungal foliar pathogen *Zymoseptoria tritici* is driven by  
2 antagonistic density-dependence mechanisms

3

4 **Running head:** Density dependence in *Zymoseptoria tritici* sexuality

5

6 **Authors:** Frédéric Suffert \*, Ghislain Delestre, Sandrine Gélisse <sup>1</sup>

7 UMR BIOGER, INRA, AgroParisTech, Université Paris-Saclay, 78850 Thiverval-Grignon,  
8 France.

9 \* corresponding author ; ORCID 0000-0001-6969-3878 ; email: frederic.suffert@inra.fr

10 <sup>1</sup> The authors are listed in descending order of the importance of their contributions.

11

12 **Acknowledgments:** We thank Nathalie Retout (INRA BIOGER, France) for technical  
13 assistance, Dr. Frédéric Hamelin (Agrocampus Ouest, France) for preliminary discussions on  
14 ecological modeling aspects, and Anne-Lise Boixel (INRA BIOGER, France) for her help in  
15 statistical analyses. We thank Julie Sappa for her help correcting our English. We thank Dr.  
16 Alexey Mikaberidze and Prof. Bruce McDonald (ETH Zürich, Switzerland) for providing the  
17 ST99CH-3D7 and ST99CH-1A5 strains of *Z. tritici* and seeds of the wheat cv. Runal. We  
18 thank the two anonymous reviewers for their constructive comments, which helped us to  
19 improve the manuscript. This study was supported by a grant from the European Union  
20 Horizon Framework 2020 Program (Grant Agreement no. 634179, EMPHASIS project)  
21 covering the 2015-2019 period.

## 22 **Abstract**

23 This study provides empirical evidence for antagonistic density-dependence mechanisms  
24 driving sexual reproduction in the wheat fungal pathogen *Zymoseptoria tritici*. Biparental  
25 crosses with 12 increasing inoculum concentrations, in controlled conditions, showed that  
26 sexual reproduction in *Z. tritici* was impacted by an Allee effect due to mate limitation and a  
27 competition with asexual multiplication for resource allocation. The highest number of  
28 ascospores discharged was reached at intermediate inoculum concentrations (from  $5.10^4$   
29 conidia.mL<sup>-1</sup> to  $10^6$  conidia.mL<sup>-1</sup>). Consistent with these results for controlled co-inoculation,  
30 we found that the intensity of sexual reproduction varied with both cropping period and the  
31 vertical position of the host tissues in the field, with a maximum between 25 and 35 cm above  
32 the ground. An optimal lesion density (disease severity of 30 to 45%) maximizing offspring  
33 (ascospores) number was established, and its eco-evolutionary consequences are considered  
34 here. Two ecological mechanisms may be involved: competition for resources between the  
35 two modes of reproduction (decrease in the host resources available for sexual reproduction  
36 due to their prior use in asexual multiplication), and competitive disequilibrium between the  
37 two parental isolates, due to differential interaction dynamics with the host, for example,  
38 leading to an imbalance between mating types. A conceptual model based on these results  
39 suggest that sexual reproduction plays a key role in the evolution of pathogenicity traits,  
40 including virulence and aggressiveness. Ecological knowledge about the determinants of  
41 sexual reproduction in *Z. tritici* may, therefore, open up new perspectives for the management  
42 of other fungal foliar pathogens with dual modes of reproduction.

43

## 44 **Keywords**

45 Allocation resource, asexual multiplication, competition, fungal pathogen, plant disease  
46 epidemiology, sexual reproduction

47

## 48 **Introduction**

49 An ability to reproduce is one of the most fundamental features of life. It has been suggested  
50 that the benefits of sexual reproduction include the purging of deleterious mutations from the  
51 genome and the production of a recombinant progeny well-adapted to a changing  
52 environment. Density-dependent mechanisms are common in microbial ecology and play a  
53 crucial role in sexual reproduction. The modeling of density-dependent selection would shed  
54 light on the ability of populations to persist despite “sex”-related conflicts, but simple models  
55 seem unable to predict the diversity of the responses observed in nature [1]. A few empirical  
56 studies have focused on the role of sex in influencing fungal population and community  
57 structures [2, 3].

58 Several density-dependent mechanisms may operate simultaneously in a population, and it is  
59 important to understand how they act, both independently and together. Positive (facilitation)  
60 density-dependent mechanisms, such as demographic Allee effects (increasing relationship  
61 between overall individual fitness and population density), linked to mate-finding, for  
62 example [4], are frequently taken into account in population dynamics studies. Negative  
63 (restriction) density-dependent mechanisms, such as competition for resources in cases of  
64 high population density, have also been widely described. The effects of competition for  
65 resources on individual fitness at low and high densities are a key, complex question in  
66 population and evolutionary ecology. For instance, Neiman et al. [5] detected a strong  
67 positive effect of high population density on reproductive output in the presence of adequate  
68 food supplies in *Potamopyrgus antipodarum* (freshwater snail), but they also identified food

69 limitation as the primary source of negative density dependence. Generally, in situations of  
70 high population density, negative density dependence often erases the demographic Allee  
71 effect through resource competition.

72 The impact of density-dependent mechanisms on sexual reproduction has mostly been studied  
73 in animal ecology, where encounters between male and female animals result from active  
74 behavior influenced by sexual dimorphism or mating advantage [1]. For instance, Stelzer [6]  
75 focused on two different mechanisms of density-dependent population regulation — resource  
76 exploitation and sexual reproduction — in populations of the rotifer *Brachionus calyciflorus*  
77 displaying different investments in sex: populations reproduce clonally at low densities, with  
78 the proportion of sexual individuals increasing at higher densities. These two mechanisms  
79 have been shown to apply to several facultatively sexual animals, but similar antagonistic  
80 density-dependent mechanisms may also operate in fungal microorganisms with dual modes  
81 of reproduction.

82 \* \* \*

83 Competitive interactions and their effect on fitness during reproduction, particularly for  
84 asexual reproduction, have been investigated in the emblematic fungal plant pathogens  
85 *Puccinia graminis* f. sp. *tritici*, the causal agent of wheat stem rust [7], and *Phytophthora*  
86 *infestans*, the causal agent of potato late blight [8]. The findings obtained were consistent with  
87 the ecological principle that resource availability decreases over time, with increasing host  
88 tissue mortality, but also during multiple infections, in which different parasite strains share  
89 the host resources. Clément et al. [8] focused on the consequences of multiple infections on  
90 asexual reproduction of *P. infestans*. By dissociating the effects of single-site and double-site  
91 infections and those of competition between identical and different isolates during double-site  
92 infections, they showed that the number of strains influences their reproductive rates. Allee

93 effects due to mate limitation have been reported to affect the dynamics of some fungal  
94 pathogens at large spatial scales, such as *Hymenoscyphus fraxineus*, the causal agent of ash  
95 dieback [9], and *Mycosphaerella fijiensis*, the causal agent of black Sigatoka disease in  
96 banana plants [10]. Sexual spores for dispersal are produced only when compatible mating  
97 types come into direct contact. However, mate limitation at the plant scale was not confirmed  
98 by experimental studies, probably because there are still many gaps in our knowledge  
99 concerning the ways in which sexual reproduction occurs in host tissues and its determinants.  
100 However, this effect forms the theoretical basis of demogenetic models combining sexual and  
101 asexual reproduction, in which the impact of mate-finding limits the speed of pathogen spread  
102 [11, 12].

103 Thus, on the one hand, pathogen population density can affect competition between  
104 individuals for limited host resources at a given reproductive stage (e.g. asexual reproduction)  
105 or the competition between asexual and sexual stages. On the other hand, it may also affect  
106 the probability of finding a mate and, thus, the intensity of sexual reproduction. Antagonistic  
107 interactions between negative and positive density-dependent mechanisms have never been  
108 studied experimentally in the reproduction of fungal plant pathogens. They could have been  
109 investigated by Clément et al. [8] for *P. infestans* co-infections with isolates of mating types  
110 A1 and A2 [13], but sexual reproduction was deliberately prevented by inoculation with  
111 incompatible isolates only.

112 \* \* \*

113 Sexual reproduction in *Zymoseptoria tritici*, the causal agent of Septoria leaf blotch of wheat,  
114 requires a physical encounter between two compatible strains (Mat1-1 and Mat1-2; [14, 15])  
115 and generally occurs on senescent tissues, with pseudothecia appearing 46 to 76 days after  
116 the initial infection in field conditions [16, 17]. It determines the amount of primary inoculum

117 (wind-dispersed ascospores) available for the initiation of subsequent epidemics and plays an  
118 essential role in maintaining the diversity of local pathogen populations and determining their  
119 rate of adaptation to selection pressures, such as those exerted by resistant hosts or fungicide  
120 treatments.

121 Avirulent *Z. tritici* strains were recently shown to cross with virulent strains on wheat  
122 cultivars carrying the corresponding resistance gene [18]. This key finding calls into question  
123 current views about the determinants of sexual reproduction, including, in particular, the  
124 common belief that individuals unable to infect wheat tissues cannot reproduce sexually.  
125 Another recent study has cast doubt on this point given the extent of epiphytic growth seen in  
126 some strains, suggesting finally that mating would be possible without penetration [19]. The  
127 proportion of crossing events resulting from the “exclusive paternal parenthood” model [18]  
128 was however not quantified at the leaf scale in the natural context of highly diverse  
129 populations. In the absence of other factual elements it should be considered that the vast  
130 majority of crossing events occur when leaf lesions caused by two compatible strains either  
131 coalesce or are located very close together. In practice, it remains unclear how close together  
132 infections must be for effective mating to occur. Metcalfe [20] found internal hyphae  
133 spanning mean distances of no more than 11 mm in a susceptible cultivar just before the  
134 production of pycnidia, suggesting that infection foci located more than 20 mm apart may be  
135 isolated. The number of offspring (i.e. the number of ascospores) should be proportional to  
136 the number of crossing events, and correlated with disease severity, which is a good proxy for  
137 lesion density. This has been shown at field scale: more severe epidemics are associated with  
138 higher levels of ascospore production during epidemics in the following year [21, 22].  
139 Moreover, the fitness (aggressiveness) of the *Z. tritici* parental isolates and a time lag between  
140 the inoculations with the two parental strains can affect sexual reproduction intensity [23].

141 The density-dependent mechanisms driving the interaction between *Z. tritici* and wheat during  
142 the asexual stage remain unclear. In particular, it remains unknown how the fungus exploits  
143 the resources of its host to obtain nutrients for growth, how it invades the apoplast during the  
144 long asymptomatic infection phase, and how the necrotrophic phase triggered [24].

145

## 146 **Objective and strategy**

147 We investigated the density dependence of both asexual and sexual reproductive mechanisms  
148 in *Z. tritici*, a relevant fungal model organism for such eco-epidemiological investigations.  
149 What impact does lesion density in host tissues have on sexual reproduction at the leaf scale?  
150 Could we generate empirical data for the establishment of a density-dependence relationship?  
151 Would this relationship be monotonic or more complex, due to competition for resources  
152 between the two modes of reproduction? This study addressed these questions. We first  
153 analyzed epidemiological datasets collected in field conditions, to confirm our initial  
154 assumptions. We then assessed the intensities of asexual and sexual reproduction after five *Z.*  
155 *tritici* biparental crosses on adult wheat plants over a period of three years.

156

## 157 **Materials & methods**

### 158 **Preliminary analysis of field epidemiological data**

159 Field epidemiological data were analyzed to assess the impact of disease severity (proxy of  
160 asexual multiplication intensity) and the vertical position of the host tissues on the intensity of  
161 subsequent sexual reproduction, during the epidemic period and then during the interepidemic  
162 period. We reanalyzed a dataset obtained in Danish field conditions by Eriksen & Munk [16],  
163 together with the data obtained in our three-year experiment in France.

164 *Epidemic period* – The relationship between the proportion of pseudothecia among the total  
165 fruiting bodies (pycnidia and pseudothecia) on wheat leaves during a growing season and  
166 mean disease severity (expressed as the percentage of the leaf area covered by pycnidia and  
167 pseudothecia) were determined with the experimental data for the field experiment performed  
168 by Eriksen & Munk [16] (Table 1).

169 *Interepidemic period* – In a field plot sown with a monoculture of wheat cv. Soissons from  
170 2007 to 2016 at the Grignon experimental station [22], standing stubble was left over an area  
171 of 20 m<sup>2</sup> during the fall of 2015-2016, 2016-2017 and 2017-2018. Stubble samples were  
172 collected three or four times each year, from September to January. Stems and leaves were  
173 partitioned from lower to upper layers, according to their vertical position (0-5 cm, 5-10 cm,  
174 10-15 cm, 15-25 cm, 25-35 cm, 35-50 cm, 50-65 cm). The dry tissues of each layer of wheat  
175 stubble were weighed, and ascospore production, as a proxy of sexual reproduction intensity,  
176 was quantified as described by Suffert et al. [17].

177

## 178 **Fungal material**

179 Five crosses were performed, with eight *Z. tritici* isolates (FS0802 × FS1006, FS0813 ×  
180 FS0732, FS0808 × FS0806, FS1022 × FS1008 [25]) collected in 2010 from wheat cv.  
181 Soissons in France, and two isolates (3D7 × 1A5 [26]) collected in 1999 from wheat cv.  
182 Galaxie and Lono (Table 1). The compatibility of the five pairs of isolates was determined by  
183 PCR amplification of the two mating-type idiomorphs [15]. The effective ability of the eight  
184 French isolates to reproduce sexually on adult plants was first checked in semicontrolled  
185 conditions [23]. Subcultures of each isolate stored at -80°C were grown for five days in Petri  
186 dishes containing PDA (potato dextrose agar, 39 g L<sup>-1</sup>) at 18°C in the dark. For each isolate,  
187 an initial conidial suspension was prepared with a Malassez counting chamber. Serial



188 dilutions (1:5) of each initial monoparental suspension were prepared, from  $10^7$  conidia mL<sup>-1</sup>  
189 to 50 conidia mL<sup>-1</sup>. Twelve biparental suspensions were then prepared by mixing 25 mL each  
190 of the appropriate monoparental suspensions and adding two drops of surfactant (Tween 20;  
191 Sigma, France).

192

### 193 **Plant material**

194 Seeds of the wheat cv. Soissons or Runal (moderately susceptible to *Septoria tritici* blotch)  
195 were sown on December 18 2014, December 14 2015, and December 15 2016 (Table 1) in  
196 Jiffy peat pots, which were then kept in greenhouse conditions for two weeks. Seedlings were  
197 vernalized in a growth chamber for 8 weeks at 8°C, with a 10-h light/14-h dark photoperiod.  
198 They were then returned to the greenhouse and left to acclimate for one week before  
199 transplantation into individual pots filled with 1 liter of commercial compost (Klasmann Peat  
200 Substrat 4; Klasmann France SARL, France). We added 4 g of slow-release fertilizer  
201 (Osmocote Exact 16-11-11N-P-K 3MgO Te) to each pot. The plants were also watered with  
202 Hydrokani C2 fertilizer (Hydro Agri Spécialités, France), diluted 1:100 and poured into the  
203 saucers under the pots. Plants were sprayed once with spiroxamine (Flexity SC at 300 g L<sup>-1</sup>;  
204 BASF, France) for the specific prevention of powdery mildew (*Blumeria graminis* f.sp.  
205 *tritici*), no later than six weeks before inoculation. During the growth period, the plants were  
206 illuminated with natural daylight supplemented with 400 W sodium vapor lamps between  
207 6.00 a.m. and 9.00 p.m. The air temperature was kept below 20°C during the 15-h light period  
208 and above 12°C during the 9-h dark period. Plants were thinned to three stems per pot during  
209 the growth period.

210

### 211 **Inoculation procedure**

212 Co-inoculations with the five biparental suspensions were carried out after the wheat heads  
213 had fully emerged (one in 2015, on April 30; two in 2016, on May 3; two in 2017, on April  
214 25; Table 1). In 2017, two complete sets of wheat plants cv. Soissons were also inoculated  
215 with each monoparental suspension (FS1022 and FS1008). The suspensions were applied  
216 with an atomizer (Ecospray, VWR, France), on three adult plants (nine stems), as described  
217 by Suffert et al. [23]. Plants were turned during the 10-second spraying event, to ensure even  
218 coverage with inoculum. Infection was promoted and cross-contamination prevented by  
219 enclosing each trio of plants inoculated with the same suspension in a sealed transparent  
220 polyethylene bag containing a small amount of distilled water for 72 h. Wheat plants were  
221 then kept in a greenhouse for about 13 weeks (from April 30 to July 24 2015, from 3 May to  
222 July 28 2016, from 25 April to August 2 2017; Figure 1a). Air temperature was kept above  
223 18°C during the spring, and reached 30°C several times during summer.

224

#### 225 **Assessment of fitness traits during the asexual stage**

226 Disease severity on leaves was assessed by eye five weeks after inoculation (on June 2 2015,  
227 June 6 2016 and May 27 2017), as the percentage of the leaf area displaying necrosis (mean  
228 for the F1, F2, and F3 leaves for each stem; 1, 2, 3 and 5%, thereafter by increments of 5% up  
229 to 100%; Figure 2). In 2016, the density of pycnidia (number of pycnidia divided by the  
230 necrotic area) and the proportion of pycnidia exuding a cirrus (Figure 2b-c) were also  
231 estimated for plants inoculated with each of the two biparental suspensions, FS0813 × FS0732  
232 and FS0808 × FS0806 (Table 1), from the necrotic area in a 6-cm leaf section from four  
233 randomly selected F1 leaves per inoculum concentration.

234

#### 235 **Promotion of sexual reproduction and ascosporeogenesis**

236 Co-inoculated plants were placed outdoors during the summer and fall (from July 24 2015 to  
237 October 9 2015, from July 28 2016 to November 14 2016, and from July 28 2017 to  
238 December 4 2017) to induce the maturation of pseudothecia (Figure 1d). Each trio of co-  
239 inoculated plants was tied up with stiff wire, with the stems and leaves clamped so as to  
240 prevent contact with other trios of plants. On October 14 2015, November 16 2016, and  
241 December 6 2017, dry leaves and stems from each trio of plants were cut into 2-cm fragments  
242 and allowed to dry, in separate open boxes, in a laboratory atmosphere, at 18°C for one week.  
243 Ascospore release was assessed immediately after drying, to check the maturity of the  
244 pseudothecia. The pseudothecia were considered mature in 2015 and 2017. By contrast, in  
245 2016, the plant debris was placed outdoors again until January 16 2017, to promote  
246 pseudothecium maturation.

247

#### 248 **Assessment of the intensity of sexual reproduction**

249 For each inoculum concentration, the debris was weighed, soaked in water for 20 min and  
250 spread on dry filter paper in a box (24 × 36 cm), the lid of which was left half open to  
251 decrease the relative humidity of the air around the debris. Eight Petri dishes (90 mm in  
252 diameter) containing PDA medium were then placed upside down 1 cm above the debris. The  
253 boxes were placed in the dark, at 18°C for 19 h. The Petri dishes were then closed and  
254 incubated in the same conditions. Each discharge event was replicated four times (from  
255 November 2015 to January 2016, from January 2016 to February 2017, and from December  
256 2017 to January 2018).

257 The ascospores released onto the Petri dishes germinated after 24 h. Six days later, yeast-like  
258 colonies resembling cream-colored convoluted heaps were observed. The colonies were  
259 counted under a microscope four and seven days after ascospore discharge. It was assumed

260 that each colony resulted from the germination of a single ascospore, and that clusters of  
261 colonies appeared just above mature pseudothecia from which several ascospores had been  
262 discharged. A cumulative ascospore discharge index ( $\Sigma$ ADI), defined as the total number of  
263 ascospores discharged per gram of wheat debris [17, 23], was calculated for each discharge  
264 event, as follows:

$$265 \quad \Sigma \text{ADI} = \sum_{e=1}^n \frac{1}{8} \cdot \frac{x \cdot y}{\pi \cdot r^2} \cdot \frac{\text{NBcol}}{\text{DW}} \quad \text{eq. 1}$$

266 where NBcol is the total number of colonies in the eight Petri dishes, DW is the total dry  
267 weight of debris spread out in the box,  $r$  is the radius of a Petri dish (4.5 cm),  $x$  and  $y$  are the  
268 width and length of the box (24 cm and 36 cm, respectively), and  $n$  is the number of discharge  
269 events ( $n = 4$ ).

270

## 271 **Assessment of yield components**

272 Yield components were assessed in 2016 and 2017 (Table 1). At maturity, the spikes were cut  
273 and hand-threshed to separate the kernels from the chaff. Kernels were then counted and  
274 weighed to estimate the grain weight per spike (GWS) and thousand-kernel weight (TKW) for  
275 each cross and inoculum concentration.

276

## 277 **Data analysis and visualization**

278 Statistical analysis - ANOVA or Kruskal-Wallis test when relevant and post hoc  
279 multiple comparisons - were performed using the R software.

280

281 A quadratic equation (eq. 2) was used to visualize the relationship between sexual  
282 reproduction intensity (SRI) and asexual multiplication intensity (AMI).

$$283 \quad \text{SRI} = a \cdot \text{AMI}^2 + b \cdot \text{AMI} + c \quad \text{eq. 2}$$

284 where  $a$ ,  $b$  and  $c$  are parameters.

285 An alternative equation integrating two types of density-dependent constraints (eq. 3) was  
286 also used. It was based on a logistic function  $f(\alpha, \beta, \gamma, \text{AMI})$  (eq. 4) describing a positive  
287 density-dependent mechanism and coupled with a function  $g(\mu, \sigma, \rho, \text{AMI})$  (eq. 5) describing a  
288 negative density-dependent mechanism.

$$289 \quad \text{SRI} = f(\alpha, \beta, \gamma, \text{AMI}) \times g(\mu, \sigma, \rho, \text{AMI}) \quad \text{eq. 3}$$

$$290 \quad f(\alpha, \beta, \gamma, \text{AMI}) = \alpha \cdot e^{(-\beta \cdot e^{-\gamma \cdot \text{AMI}})} \quad \text{eq. 4}$$

$$291 \quad g(\mu, \sigma, \rho, \text{AMI}) = \mu - (\mu - \sigma) \left( e^{(-\ln \mu \cdot e^{(-\rho \cdot \text{AMI})})} - 0.01 \right) \quad \text{eq. 5}$$

292 where  $\alpha$ ,  $\beta$ ,  $\gamma$ ,  $\mu$ ,  $\sigma$ , and  $\rho$  are parameters.

293 Both equations were adjusted with the data generated by the five crosses, with the estimation  
294 of SRI by determination of the cumulative ascospore discharge index ( $\Sigma\text{ADI}$ ) and of AMI  
295 with the percentage of the total area displaying necrosis.

296

## 297 **Results**

298 **Sexual reproduction in field conditions varies according to the cropping period and the**  
299 **vertical position of the infected host tissues in the canopy**

300 The epidemiological data obtained by Eriksen & Munk [16] in field conditions showed that  
301 the proportion of pseudothecia (proxy for the intensity of sexual reproduction) present on  
302 wheat leaves varies with disease severity (proxy for asexual multiplication intensity; Figure 3)  
303 over the cropping season. Our reanalysis of these data made it possible to limit bias due to  
304 fruiting dynamics (the latent period is much longer for pseudothecia than for pycnidia). The  
305 proportion of pseudothecia was maximal for severities of 50 to 80%. This proportion  
306 remained stable or even decreased at severities above 80%.

307 Monitoring of the dynamics of sexual reproduction on standing stubble over three  
308 interepidemic periods revealed a vertical structuring of mean ascospore production on  
309 senescent wheat tissues (Online Resource 1). This vertical structuration changed over time.  
310 Ascospore numbers peaked in November (2015, 2016) or December (2017). Ascospore  
311 production generally increased with distance from the ground, up to a height of 25 cm (Figure  
312 4). This layer corresponds to the part of the stubble not usually exported at harvest. The 25-35  
313 cm layer made the largest contribution to sexual reproduction. Above this height, ascospore  
314 production follows the opposite trend, gradually decreasing between 35 and 65 cm. The  
315 lowest layer of standing stubble, which includes the crown and what remains of the first  
316 leaves to emerge before tillering, generated less than 5% of the total number of ascospores.

317

### 318 **The general interaction between *Z. tritici* and wheat is density-dependent**

319 The interaction between the pathogen and the host plant is clearly density-dependent.  
320 Regardless of the year in which the cross was performed (2015, 2016 or 2017), the biparental  
321 suspension used and the host cultivar (Soissons or Runal), inoculum concentration (total  
322 number of *Z. tritici* conidia in the biparental suspension per mL) was positively related to the  
323 estimated mean disease severity (percentage of necrotic area) for the three uppermost leaves

324 of the adult wheat plants (Figure 5). Soissons was particularly susceptible to the isolates with  
325 which it was co-inoculated (mean sporulation area of 60% for an inoculum concentration of  $5$   
326  $\times 10^5$  conidia.mL<sup>-1</sup>), whereas Runal was more resistant (35%). For both varieties, disease  
327 severity (80%) was maximal at an inoculum concentration of  $10^7$  conidia.mL<sup>-1</sup>.

328 Mean severity on the three uppermost leaves of adult wheat plants cv. Soissons and Runal  
329 was inversely correlated with total grain weight per spike (GWS), and thousand kernel weight  
330 (TKW): late (inoculation after flowering) and intense attacks (sporulation over 80% of the  
331 area) decreased grain yield by up to 20-25% (Figure 6). *Z. tritici* attacks had a strong impact  
332 on wheat yield, demonstrating that the interaction between the pathogen and the host plant  
333 was density-dependent, i.e. a function of pathogen inoculum pressure.

334

### 335 **Competition for resources affects asexual multiplication in *Z. tritici***

336 We observed robust, negative relationships between mean disease severity and the density of  
337 pycnidia within lesion, and between mean disease severity and the percentage of exuding  
338 pycnidia (i.e. density of cirrhi within lesion) in 2016 (Figure 7): more intense *Z. tritici* attacks  
339 were associated with a lower density of pycnidia, and a lower percentage of exuding pycnidia.  
340 For both FS813  $\times$  FS732 and FS808  $\times$  FS806 crosses, severe attacks (mean sporulation area  
341 of 80%) halved the density of pycnidia (150 vs. 300 pycnidia.cm<sup>-2</sup>) and the percentage of  
342 exuding pycnidia (45 vs. 90%). Thus, the asexual development of *Z. tritici* is affected by  
343 competition for resource allocation.

344 Disease severity reached after inoculation with an isolate inoculated alone (FS1008) was  
345 compared to the disease severity reached after inoculation with a biparental suspension  
346 (FS1008  $\times$  FS1022) containing the same number conidia of the previous isolate (FS1008).  
347 Each of the five groups of plants that were compared was thus exposed to a single or double

348 *Z. tritici* inoculum pressure, but to the same amount of FS1008 conidia. The comparison  
349 highlighted competitive disequilibrium between the two parental isolates (Figure 8). This  
350 finding provides a second line of evidence that the asexual development of *Z. tritici* is driven  
351 by density-dependent processes. Soissons appeared to be more susceptible to FS1008 than to  
352 FS1022, regardless of the concentration of the inoculum: in practice, FS1008 was more  
353 aggressive than FS1022 (e.g. disease severity with FS1008 was twice that with FS1022 for  
354 inoculum concentrations of  $5 \cdot 10^3$  to  $5 \cdot 10^5$  conidia.mL<sup>-1</sup>). From inoculum concentrations of  
355  $5 \cdot 10^3$  to  $5 \cdot 10^4$  conidia.mL<sup>-1</sup>, FS1008 induced a less severe attack if the other, less aggressive  
356 isolate (FS1022) was present at the same concentration. This difference was significant  
357 provided that the number of FS1022 conidia was the same. It disappeared at the highest  
358 inoculum concentrations ( $> 10^5$  conidia.mL<sup>-1</sup>, corresponding to a disease severity of 35-40%).  
359 Furthermore, the results for the mixture are actually very close to what would be seen with the  
360 same inoculum pressure ( $10^4$  and  $10^5$  conidia.mL<sup>-1</sup>) with only the less aggressive isolate  
361 (FS1022).

362

### 363 **Competition with asexual multiplication for resource allocation affects sexual** 364 **reproduction in *Z. tritici***

365 Ascospores were collected after each of the five crosses in 2015, 2016 and 2017. The number  
366 of ascospores was largest for the FS802 × FS1006 cross in 2015 and lowest for the FS808 ×  
367 FS806 cross in 2016 (Online Resource 2; Figure 9). Moreover, in 2016, the first ascospores  
368 were collected later in the season (January), due to relatively the dry weather from August to  
369 September 2016 (65 mm of rainfall, versus the mean of 170 mm generally observed this  
370 period). A similar effect of year was also observed with the ascomycetes *Leptosphaeria*



371 *maculans* (Marie-Hélène Balesdent, INRA BIOGER, pers. comm.) and *Septoria linicola*  
372 (Annette Penaud, Terres Inovia, pers. comm.) in the same experimental area.

373 For all crosses, the number of ascospores discharged increased with inoculum concentration.  
374 The smallest numbers of ascospores were collected for the lowest inoculum concentrations  
375 ( $50$  or  $10^2$  conidia.mL<sup>-1</sup>). The number of ascospores discharged at the highest inoculum level  
376 ( $10^7$  conidia.mL<sup>-1</sup>) was however systematically below the maximum number. For crosses on  
377 Soissons, this maximum was reached for inoculum concentrations of  $5 \times 10^4$  conidia.mL<sup>-1</sup>  
378 (FS802  $\times$  FS1006 and FS813  $\times$  FS732) to  $10^6$  conidia.mL<sup>-1</sup> (FS813  $\times$  FS732 and FS1022  $\times$   
379 FS1008). It was reached for an inoculum concentration of  $5 \times 10^6$  conidia.mL<sup>-1</sup> for the cross  
380 performed on Runal (3D7  $\times$  1A5), on which disease severity was significantly lower than on  
381 Soissons for inoculum levels of  $5 \times 10^2$  to  $5 \times 10^6$  conidia.mL<sup>-1</sup> (Figure 5). This pattern was  
382 even more marked for the relationship between disease severity (proxy for asexual  
383 multiplication intensity) and the normalized number of ascospores (proxy for sexual  
384 reproduction intensity; Figure 10). The quadratic model and a model integrating two density-  
385 dependent constraints converged for three crosses (FS802  $\times$  FS1006, FS808  $\times$  FS806, FS1022  
386  $\times$  FS1008), with the intensity of sexual reproduction increasing to a peak for disease severities  
387 of 35 to 50% and then decreasing thereafter. This pattern was particularly marked for the  
388 FS802  $\times$  FS1006 and FS808  $\times$  FS806 crosses. The initial ascending part of the curves  
389 illustrates an Allee effect (difficulty finding mates at low pathogen densities), whereas the  
390 second, descending part of the curve highlights competition for resource allocation between  
391 the two modes of reproduction (fewer host resources available for sexual reproduction due  
392 their previous mobilization for asexual multiplication).

393

## 394 **Discussion**

395 In field conditions, the different layers of wheat plants, from the soil to the head, contribute  
396 differently to *Z. tritici* reproduction. We showed that mean *Z. tritici* ascospore production was  
397 maximal between 25 and 35 cm above the ground. This significant impact of vertical  
398 positioning is complementary to the findings of Pfender & Wootke [27], who established that  
399 the pseudothecia of *Pyrenophora tritici-repentis* survived well in standing stubble and upper  
400 mulch layers, but not in straw or mulch located in the soil or directly on its surface. At least  
401 two antagonistic mechanisms are likely to account for the increase and subsequent decrease in  
402 sexual reproduction intensity with increasing height of the canopy layer above the ground.  
403 Higher positions in the canopy are associated with a lower density of lesions. The probability  
404 of crosses occurring, therefore, also decreases with height. Furthermore, higher positions in  
405 the canopy are occupied by younger wheat tissues, on which infections are likely to be more  
406 recent, with a lower probability of ascosporeogenesis having had time to occur. Lower down in  
407 the canopy, the wheat tissues are older and the pseudothecia are already empty or degraded.  
408 These empirical observations thus complete the results obtained by reanalyzing the dataset of  
409 Eriksen & Munk [16].

410

\* \* \*

411 Traits relating to asexual multiplication *in planta*, such as the density and exudation capacity  
412 of pycnidia, are affected by competition between the two parental isolates for resources. This  
413 result is consistent with the lower level of pycnidial coverage observed after inoculation with  
414 mixtures of isolates than after inoculation with single isolates [28, 29]. The competitive  
415 disequilibrium between the two parental isolates may also account for the density dependence  
416 of asexual development in *Z. tritici*. This finding is consistent with previous results obtained  
417 in the same experimental conditions in a previous study [23], in which an interval of two to  
418 three weeks between inoculation with the first parental isolate and inoculation with the second  
419 was found to be detrimental to ascosporeogenesis. In this case, the host tissues were likely to

420 be colonized by the first isolate, leaving fewer host resources available for the second isolate,  
421 consistent with the establishment of competition during the asexual stage of the disease cycle.  
422 Interactions of this type were studied by Clement et al. [8], who identified two basic response  
423 patterns, consisting of an increase or decrease in reproductive fitness in multiple infections of  
424 potato leaves with *P. infestans*, depending on pathogen genotype. In the case of *Z. tritici*, the  
425 activation of host defenses by the less virulent or less aggressive isolate may limit the  
426 subsequent development of a second more aggressive isolate at low inoculum pressure.  
427 Conversely, at high inoculum pressure, the host sites for infection are likely to be saturated,  
428 regardless of the aggressiveness of the isolates causing the infection. The less aggressive  
429 isolate (i.e. to which the host is less susceptible) may trigger defense responses that ultimately  
430 prevent the more aggressive isolate from developing to the extent that it would have if used  
431 alone for inoculation. The highest inoculum pressure was so high that this mechanism was not  
432 expressed.

433 Cirrhi produced by different isolates may contain different densities of pycnidiospores or may  
434 be produced later or earlier than five weeks after inoculation, and thus could bias the analysis.  
435 These differences between isolates may also be affected by environmental factors. Such  
436 aspects are beyond the scope of the current work but should be taken into account more  
437 accurately in further studies. Moreover, other reasons than competition for resources *sensu*  
438 *stricto* may explain the negative relationships between mean disease severity and the density  
439 of pycnidia or cirrhi within lesions. The presence of necrotic leaf tissue and the presence of  
440 pycnidia and cirrhi are the result of different developmental processes of the fungus and of  
441 different stages of the plant-fungus interaction [30]. Therefore, we can imagine a case where  
442 a proliferation of necrotic tissue does not lead to a proliferation of pycnidia due to the  
443 triggering of defence responses or to fungal auto-inhibition.

444

\* \* \*

445 Sexual reproduction is driven by at least two density-dependent mechanisms with opposite  
446 impacts: a positive Allee effect due to mate limitation, and with a negative effect due to  
447 competition with asexual multiplication for resources. We provide here the first experimental  
448 evidence that sexual reproduction in a fungal foliar pathogen is driven by antagonistic  
449 density-dependent mechanisms.

450 *Positive density dependence of sexual reproduction* - Higher densities of *Z. tritici* lesions on  
451 leaves and stems are associated with a higher probability of encounter and a higher intensity  
452 of sexual reproduction. Mate limitation has been identified as the most common mechanism  
453 underlying Allee effects [4]. This experimental result is supported by the positive correlations  
454 previously established in natural conditions at both the field and landscape scales: ascospore  
455 production is generally greatest after the most severe epidemics [21, 22].

456 *Negative density dependence of sexual reproduction* - Strong *Septoria tritici* blotch attacks (i.e  
457 intense asexual multiplication) limit the resources available for sexual reproduction, resulting  
458 in a detrimental effect. We showed that competition between the two parental isolates during  
459 asexual multiplication is plausible and may lead to an imbalance between mating types.  
460 However, this explanation appears to be less relevant in natural conditions, given the high  
461 diversity of the pathogen population even at the leaf scale (sex ratio close to 1). As illustrated  
462 by the negative impact on fruiting and sporulating capacity, competition also limits the  
463 potential development of parental isolates in a similar way: host resources are overexploited  
464 during the asexual phase, to the detriment of sexual reproduction.

465 The optimal equilibrium between asexual and sexual reproduction in semi-controlled  
466 conditions corresponds to a disease severity of 30 to 45%. This optimum severity is lower  
467 than that observed in the field on the leaves of the lower plant layers, on which severity may  
468 reach very high levels (80-100%) and which senesce faster than the leaves of the upper layers.

469 Eriksen & Munk [16] reported that pseudothecia form only at disease severities exceeding  
470 38%, following the coalescence of lesions, and that the highest proportion of pseudothecia  
471 occurs on leaves with a disease severity of 50 to 80%. Furthermore, the equation we fitted to  
472 these experimental data revealed no negative density-dependent effect, perhaps because the  
473 epidemiological survey stopped earlier (August) than in our own experiment conditions,  
474 suggesting that the pseudothecia may not have been mature in the upper plant layers.

475

\* \* \*

476 As a final step in this study, we developed an overall synthetic representation of the  
477 relationship between the investments of *Z. tritici* in the two modes of reproduction at the host-  
478 tissue scale, taking into account the ecological processes discussed above. In Figure 11, we  
479 propose a theoretical relationship between asexual multiplication intensity (disease severity)  
480 and sexual reproduction intensity (ability to produce offspring). The number of fruitful  
481 encounters between parental isolates initially increases with increasing disease severity (1).  
482 During this first stage, competition between isolates may lead to mating-type disequilibrium,  
483 with an impact on sexual reproduction (2). At disease severities of more than 30-45%, a high-  
484 density pathogen population becomes disadvantageous, due to competition for host resources  
485 between the asexual and sexual modes of reproduction (3). This conceptual model is  
486 complementary to the findings of Suffert et al. [23], formalized by the title “Fashionably late  
487 partners have more fruitful encounters”. We can now extend the metaphor by providing *Z.*  
488 *tritici* with additional advice for even more fruitful encounters: “Do not live as a hermit but  
489 avoid crowded places!” This view was already put forward by Kokko & Rankin [1], in their  
490 study entitled “Lonely hearts or sex in the city?”  
491 Is an optimal disease severity of 30-45% an appropriate ecological equilibrium determining  
492 the evolutionary endpoints of selection in *Z. tritici*? This theoretical question needs to be  
493 addressed in an evolutionary ecology perspective, and we can now use empirical data to try to

494 answer it. Indeed, a successful parasitic life depends on optimal exploitation of the host to  
495 satisfy key functions directly involved in reproductive fitness. Theoretically, both weakly  
496 aggressive isolates causing only a few small lesions, and very aggressive isolates causing  
497 large numbers of large lesions, have a lower probability of transmitting a part of their genetic  
498 background by sexual reproduction than isolates with intermediate levels of aggressiveness.  
499 This view is complementary to the findings of Kema et al. [19], which explained the  
500 maintenance of avirulent individuals in the pathogen population despite the widespread  
501 deployment of resistance genes (e.g. AvrStb6 despite the extensive presence of Stb6 in the  
502 wheat lines used in breeding programs worldwide [31]; Thierry Marcel, INRA BIOGER,  
503 com. pers.). Sexual reproduction therefore plays a key role in both the evolution of virulence  
504 and aggressiveness.

505 A previous study [23] revealed an absence of functional trade-offs between the two modes of  
506 reproduction in *Z. tritici*: no adaptive compromise was established between pathogenicity and  
507 transmission in analyses of pathogen life traits at the individual level. An overall  
508 epidemiological trade-off was, however, established between intra- and interannual scales  
509 over a larger spatiotemporal scale (field and surrounding area), probably driven by the  
510 consequences of sexual reproduction for local population dynamics relating to selection and  
511 counter-selection [22]. However it is not clear that the optimal equilibrium between sexual  
512 and asexual reproduction corresponds to the maximal intensity of sexual reproduction, as one  
513 could think; asexual reproduction may be for instance more beneficial to overall strain fitness  
514 in the early stages of an epidemic, where inoculum (estimated for instance by the number of  
515 infection units available per m<sup>2</sup> of crop) is more limited than during the spring period [32].  
516 According to the findings reported here, the potential antagonism between the asexual and  
517 sexual modes of reproduction and its epidemiological consequences appear to be more  
518 complex, due to a dependence on scale, from host tissues up to agricultural landscape scale.

519 Sexual reproduction is clearly a key process in the eco-epidemiology of *Septoria tritici* blotch.  
520 An understanding of its determinants may open up new perspectives for the management of  
521 other foliar fungal pathogens with dual modes of reproduction.

522

## 523 **References**

- 524 1. Kokko H, Rankin DJ (2010) Lonely hearts or sex in the city? Density-dependent effects in  
525 mating systems. *Philosophical Transactions in the Royal Society B* 361:319-334.
- 526 2. Lee SC, Ni M, Li W, Shertz C, Heitman J (2010) The evolution of sex: a perspective from  
527 the fungal kingdom. *Microbiology and Molecular Biology Reviews* 74:298-340.3.
- 528 3. Lively CM (2009) The maintenance of sex: host-parasite coevolution with density-  
529 dependent virulence. *Journal of Evolutionary Biology* 22:2086-2093.
- 530 4. Gascoigne J, Berec L, Gregory S, Courchamp F (2009) Dangerously few liaisons: a review  
531 of mate-finding Allee effects. *Population Ecology* 51:355-372.
- 532 5. Neiman M, Warren D, Rasmussen B, Zhang S (2013) Complex consequences of increased  
533 density for reproductive output in an invasive freshwater snail. *Evolutionary Ecology*  
534 27:1117-1127.
- 535 6. Stelzer CP (2012) Population regulation in sexual and asexual rotifers: an eco-evolutionary  
536 feedback to population size? *Functional Ecology* 26:180-188.
- 537 7. Newton MR, Kinkel LL, Leonard KJ (1997) Competition and density-dependent fitness in  
538 a plant parasitic fungus. *Ecology* 78:1774-1784.

- 539 8. Clément JAJ, Magalon H, Glais I, Jacquot E, Andrivon D (2012) To be or not to be  
540 solitary: *Phytophthora infestans*' dilemma for optimizing its reproductive fitness in  
541 multiple infections. PLoS ONE 7: e37838.
- 542 9. Gross A, Holdenrieder O, Pautasso M, Queloz V, Sieber TN (2014) *Hymenoscyphus*  
543 *pseudoalbidus*, the causal agent of European ash dieback. Molecular Plant Pathology  
544 15:5-21.
- 545 10. Halkett F, Coste D, Platero GG, Zapater MF, Abadie C, Carlier J (2010) Genetic  
546 discontinuities and disequilibria in recently established populations of the plant  
547 pathogenic fungus *Mycosphaerella fijiensis*. Molecular Ecology 19:3909-3923.
- 548 11. Hamelin FM, Castella F, Doli V, Marçais B, Ravigné V, Lewis MA (2016) Mate finding,  
549 sexual spore production, and the spread of fungal plant parasites. Bulletin of  
550 Mathematical Biology 78:695-712.
- 551 12. Ravigné V, Lemesle V, Walter A, Mailleret L, Hamelin L (2017) Mate limitation in  
552 fungal plant parasites can lead to cyclic epidemics in perennial host populations.  
553 Bulletin of Mathematical Biology 79:430-447.
- 554 13. Hamed BH, Gisi U (2013) Generation of pathogenic F1 progeny from crosses  
555 of *Phytophthora infestans* isolates differing in ploidy. Plant Pathology 62:708-718.
- 556 14. Kema GHJ, Verstappen ECP, Todorova M, Waalwijk C (1996) Successful crosses and  
557 molecular tetrad and progeny analyses demonstrate heterothallism in *Mycosphaerella*  
558 *graminicola*. Current Genetics 30:251-258.
- 559 15. Waalwijk CO, Mendes O, Verstappen EC, De Waard MA, Kema GH (2002) Isolation and  
560 characterization of the mating-type idiomorphs from the wheat septoria leaf blotch  
561 fungus *Mycosphaerella graminicola*. Fungal Genetics and Biology 35:277-286.



- 562 16. Eriksen L, Munk L (2003) The occurrence of *Mycosphaerella graminicola* and its  
563 anamorph *Septoria tritici* in winter wheat during the growing season. *European Journal*  
564 *of Plant Pathology* 109:253-259.
- 565 17. Suffert F, Sache I, Lannou C (2011) Early stages of septoria tritici blotch epidemics of  
566 winter wheat: Build-up, overseasoning, and release of primary inoculum. *Plant*  
567 *Pathology* 60: 166-177.
- 568 18. Kema GHJ, Mirzadi Gohari A, Aouini L, Gibriel HAY, Ware SB, van den Bosch F,  
569 Manning-Smith R, Alonso-Chavez V, Helps J, Ben M'Barek S, Mehrabi R, Diaz-  
570 Trujillo C, Zamani E, Schouten HJ, van der Lee TAJ, Waalwijk C, de Waard MA, de  
571 Wit PJGM, Verstappen ECP, Thomma BPHJ, Meijer HJG, Seidl MF (2018) Stress and  
572 sexual reproduction affect the dynamics of the wheat pathogen effector AvrStb6 and  
573 strobilurin resistance. *Nature Genetics*, in press.
- 574 19. Fones HN, Eyles CJ, Kay W, Cowper J, Gurr SJ (2017) A role for random, humidity-  
575 dependent epiphytic growth prior to invasion of wheat by *Zymoseptoria tritici*. *Fungal*  
576 *Genetics and Biology*. 106:51-60.
- 577 20. Metcalfe RJ (1998) Selection for resistance to demethylation inhibitor fungicides in  
578 *Mycosphaerella graminicola* on wheat. PhD, The University of Reading.
- 579 21. Cowger C, McDonald BA, Mundt CC (2002) Frequency of sexual reproduction by  
580 *Mycosphaerella graminicola* on partially resistant wheat cultivars. *Phytopathology*  
581 92:1175-1181.
- 582 22. Suffert F, Goyeau H, Sache I, Carpentier F, Gélisse S, Morais D, Delestre G (2018)  
583 Epidemiological trade-off between intra- and interannual scales in the evolution of  
584 aggressiveness in a local plant pathogen population. *Evolutionary Applications*, in press

- 585 23. Suffert F, Delestre G, Carpentier F, Walker AS, Gazeau G, Gélisse S, Duplaix C (2016)  
586 Fashionably late partners have more fruitful encounters: impact of the timing of co-  
587 infection and pathogenicity on sexual reproduction in *Zymoseptoria tritici*. Fungal  
588 Genetics and Biology 92:40-49.
- 589 24. Sánchez-Vallet A, McDonald MC, Solomon PS, McDonald BA (2015) Is *Zymoseptoria*  
590 *tritici* a hemibiotroph? Fungal Genetics and Biology 79: 29-32.
- 591 25. Suffert F, Ravigné V, Sache I (2015) Seasonal changes drive short-term selection for  
592 fitness traits in the wheat pathogen *Zymoseptoria tritici*. Applied and Environmental  
593 Microbiology 81:6367-6379.
- 594 26. Zhan J, Kema GHJ, Waalwijk C, McDonald BA (2002) Distribution of mating type alleles  
595 in the wheat pathogen *Mycosphaerella graminicola* over spatial scales from lesions to  
596 continents. Fungal Genetics and Biology 36:128-136.
- 597 27. Pfender WF, Wootke SL (1988) Microbial communities of *Pyrenophora*-infested wheat  
598 straw as examined by multivariate analysis. Microbial Ecology 15:95-113.
- 599 28. Zelikovitch N, Eyal Z (1991) Reduction in pycnidial coverage after inoculation of wheat  
600 with mixtures of isolates of *Septoria tritici*. Plant Disease 75:907-910.
- 601 29. Eyal Z (1992) The response of field-inoculated wheat cultivars to mixtures of *Septoria*  
602 *tritici* isolates. Euphytica 61:25-35.
- 603 30. Haueisen J, Moeller M, Eschenbrenner CJ, Grandaubert J, Seybold H, Adamiak H,  
604 Stukenbrock EH (2017) Extremely flexible infection programs in a fungal plant  
605 pathogen. bioRxiv 229997, <https://doi.org/10.1101/229997>

- 607 31. Saintenac C, Lee W-S, Cambon F, Rudd JJ, King RC, Marande W, Powers SJ, Bergès H,  
608 Phillips AL, Uauy C, Hammond-Kosack KE, Langin T, Kanyuka K (2018) Wheat  
609 receptor-kinase-like protein Stb6 controls gene-for-gene resistance to fungal pathogen  
610 *Zymoseptoria tritici*. Nature Genetics, in press.
- 611 32. Suffert F, Satche I (2011) Relative importance of different types of inoculum to the  
612 establishment of *Mycosphaerella graminicola* in wheat crops in north-west Europe.  
613 Plant Pathology 60:878-889.

**Table 1.** List of fitness traits and yield components assessed during the asexual and sexual stages for the five *Zymoseptoria tritici* crosses on adult wheat plants.

| Year | Parental isolate               | Mating type      | Host cv. | Fitness traits |                                            |                      | Yield components |                  |
|------|--------------------------------|------------------|----------|----------------|--------------------------------------------|----------------------|------------------|------------------|
|      |                                |                  |          | Asexual stage  |                                            | Sexual stage         | GWS <sup>1</sup> | TKW <sup>2</sup> |
|      |                                |                  |          | Necrotic area  | Density and exudation capacity of pycnidia | Ascospore production |                  |                  |
| 2015 | INRA09-FS0802<br>INRA09-FS1006 | Mat1-1<br>Mat1-2 | Soissons | ×              |                                            | ×                    |                  |                  |
| 2016 | INRA09-FS0813<br>INRA09-FS0732 | Mat1-1<br>Mat1-2 | Soissons | ×              | ×                                          | ×                    | ×                | ×                |
| 2016 | INRA09-FS0808<br>INRA09-FS0806 | Mat1-1<br>Mat1-2 | Soissons | ×              | ×                                          | ×                    | ×                | ×                |
| 2017 | INRA09-FS1022<br>INRA09-FS1008 | Mat1-1<br>Mat1-2 | Soissons | ×              |                                            | ×                    | ×                | ×                |
| 2017 | ST99CH-3D7<br>ST99CH-1A5       | Mat1-1<br>Mat1-2 | Runal    | ×              |                                            | ×                    | ×                | ×                |

<sup>1</sup> grain weight per spike

<sup>2</sup> thousand-kernel weight

<sup>3</sup> also assessed on two sets of plants inoculated separately with each monoparental suspension

**Fig.1** (a) Adult wheat plants cv. Soissons (three replicates per inoculum concentration) five weeks after their inoculation in the greenhouse with 12 biparental suspensions of *Zymoseptoria tritici* isolates (FS808 and FS806), at concentrations of 50 to  $10^7$  conidia.mL<sup>-1</sup>. Plants are ranked from the lowest (left) to the highest concentration (right). (b-c) Sporulating area on the flag leaf, characterized by a high density of pycnidia, with high (b) and low (c) exudation capacities. (d) Trios of plants stored outdoors to induce sexual reproduction and ascosporeogenesis.

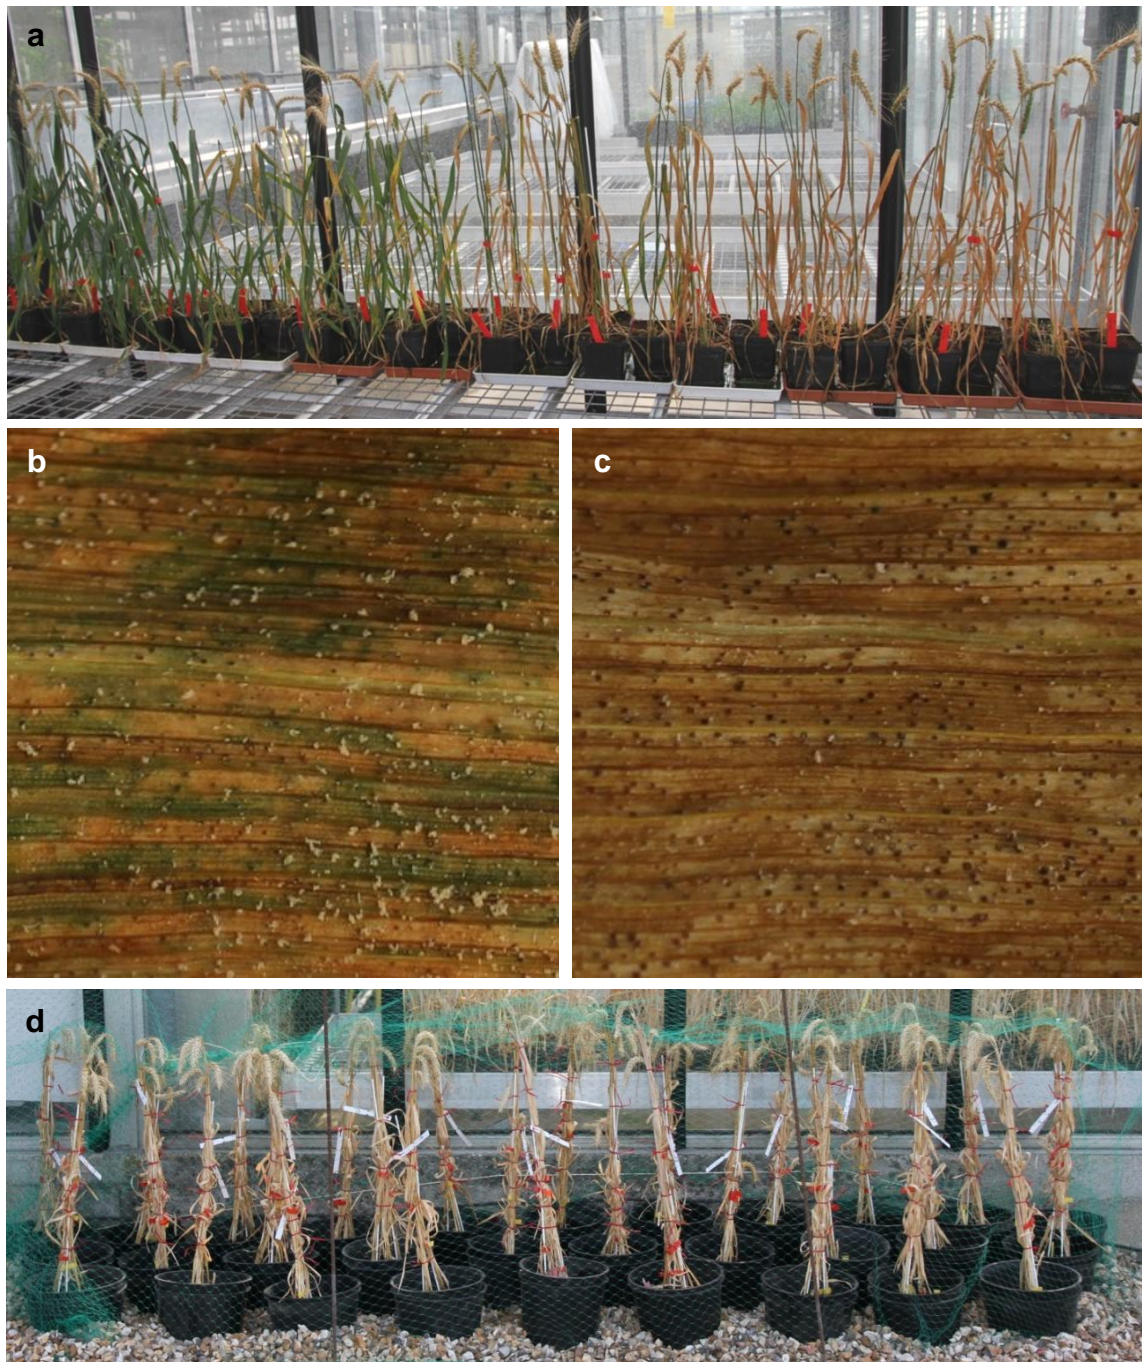

**Fig.2** Visual rating scale used to quantify the intensity of *Zymoseptoria tritici* asexual multiplication (disease severity assessed as a percentage of necrotic area) on the three uppermost leaves (F1, F2 and F3) of adult wheat plants. The images show the 2-7 cm section of the flag leaves over their point of insertion on the stem.

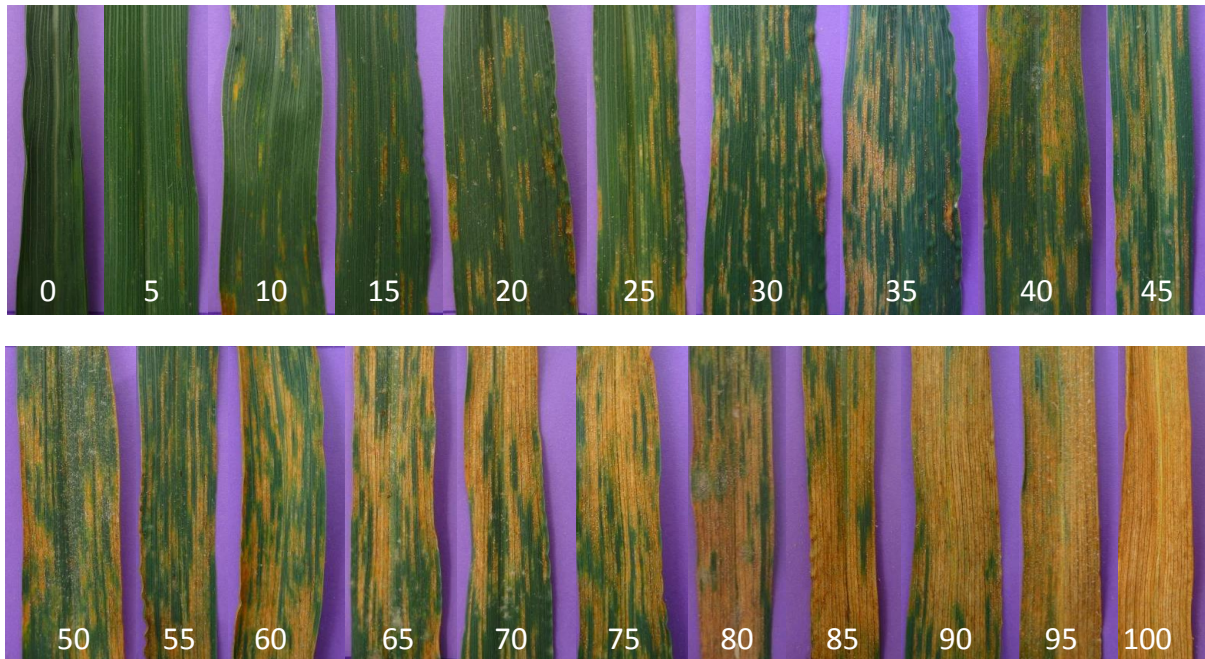

**Fig.3** Relationship between the proportion of pseudothecia among the total fruiting bodies on wheat leaves in field conditions and the mean severity of *Septoria tritici* blotch expressed as a percentage of the leaf area covered by pycnidia or pseudothecia. An equation integrating different density-dependent constraints (bold line; see eq. 3 in Material & Methods) was fitted to some of the experimental data (◆) obtained by Eriksen et al. [16] (Table 1) in a two-year field survey in Denmark. Data for leaves L8 to L11 (basal leaf layers) were excluded (×) because no pseudothecia were found whatever the level of disease severity, probably due to their advanced state of decomposition; data for leaves L5 to L7 (collected before mid-June), L1 (flag leaf), and L2 (collected before August), were also excluded (+), because sexual reproduction was probably incomplete (29-53 days between the appearance of the first pycnidia and the appearance of the first pseudothecia [16]).

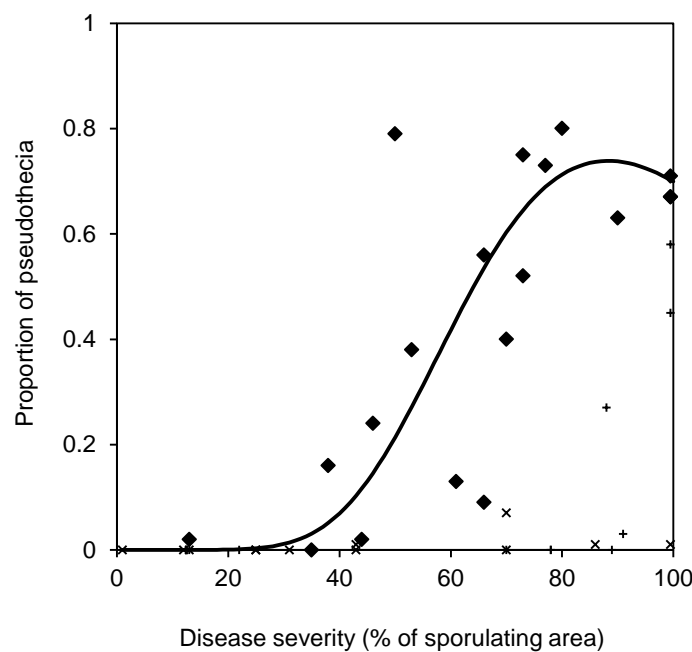

**Fig.4** Impact of the vertical position of wheat tissues in standing stubble left in the field in the fall (stems and leaves, from lower to upper layers: 0-5 cm, 5-10 cm, 10-15 cm, 15-25 cm, 25-35 cm, 35-50 cm, 50-65 cm) on the intensity of *Zymoseptoria tritici* sexual reproduction expressed as the number of ascospores collected per gram of debris (logarithmic scale) on three or four dates (from September to January) over three interepidemic periods (2015-2016, 2016-2017, 2017-2018). The mean contribution of each stubble layer to sexual reproduction is expressed as a percentage of the total number of ascospores collected during each interepidemic period.

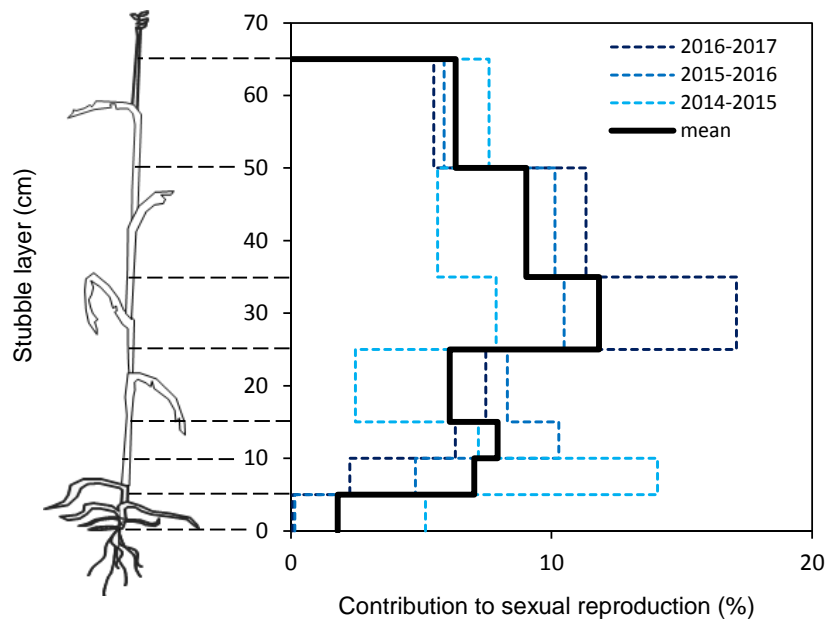



**Fig.5** Relationship between *Zymoseptoria tritici* inoculum concentration (total number of conidia per mL) and mean intensity of asexual multiplication (disease severity assessed as a % of necrotic area) estimated on the three uppermost leaves of adult wheat plants. Inoculation with biparental suspensions of isolates FS802 × FS1006 (2015), FS813 × FS732 (2016), FS808 × FS806 (2016), and FS1022 × FS1008 (2017) were performed on cv. Soissons; Inoculations with biparental suspensions of isolates 3D7 × 1A5 (2017) were performed on cv. Runal.

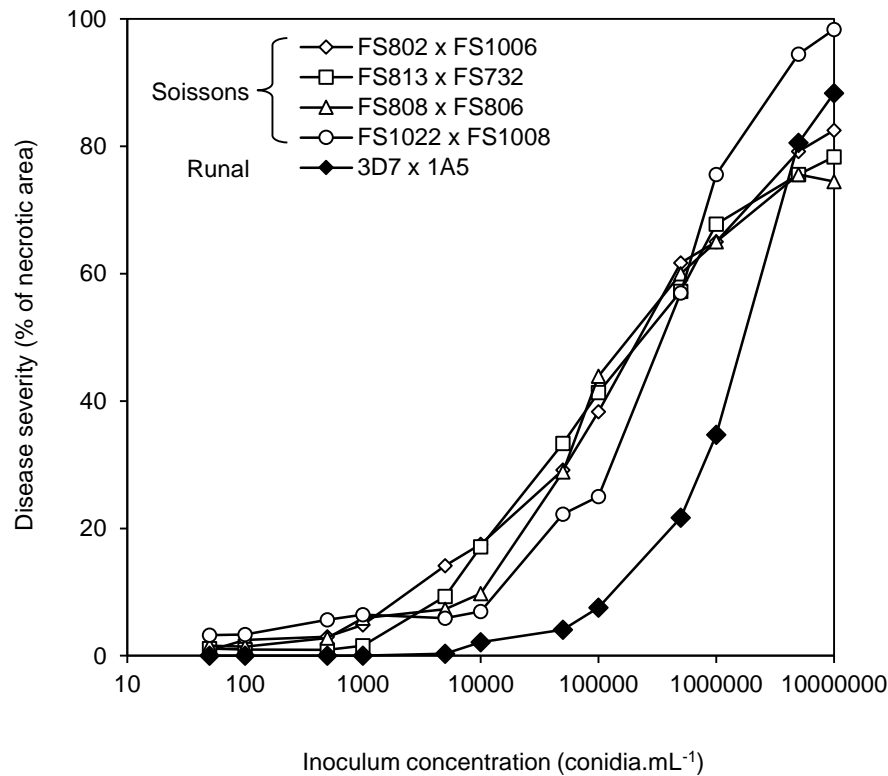

**Fig.6** Relationship between the mean intensity of asexual multiplication in *Zymoseptoria tritici* (disease severity assessed as a % of necrotic area) on the three uppermost leaves of adult wheat plants cv. Soissons (black symbols) or Runal (white symbol), and (a, c, e) total grain weight per spike (GWS) or (b, d, f) thousand-kernel weight (TKW). Disease severity was assessed five weeks after inoculation with monoparental or biparental suspensions of isolates FS806, FS808, FS732, and FS813 in 2016, and FS1022, FS1008, 1A5, and 3D7 in 2017. Vertical bars represent the standard deviation. The Pearson correlation coefficient (R) is given for each relationship.

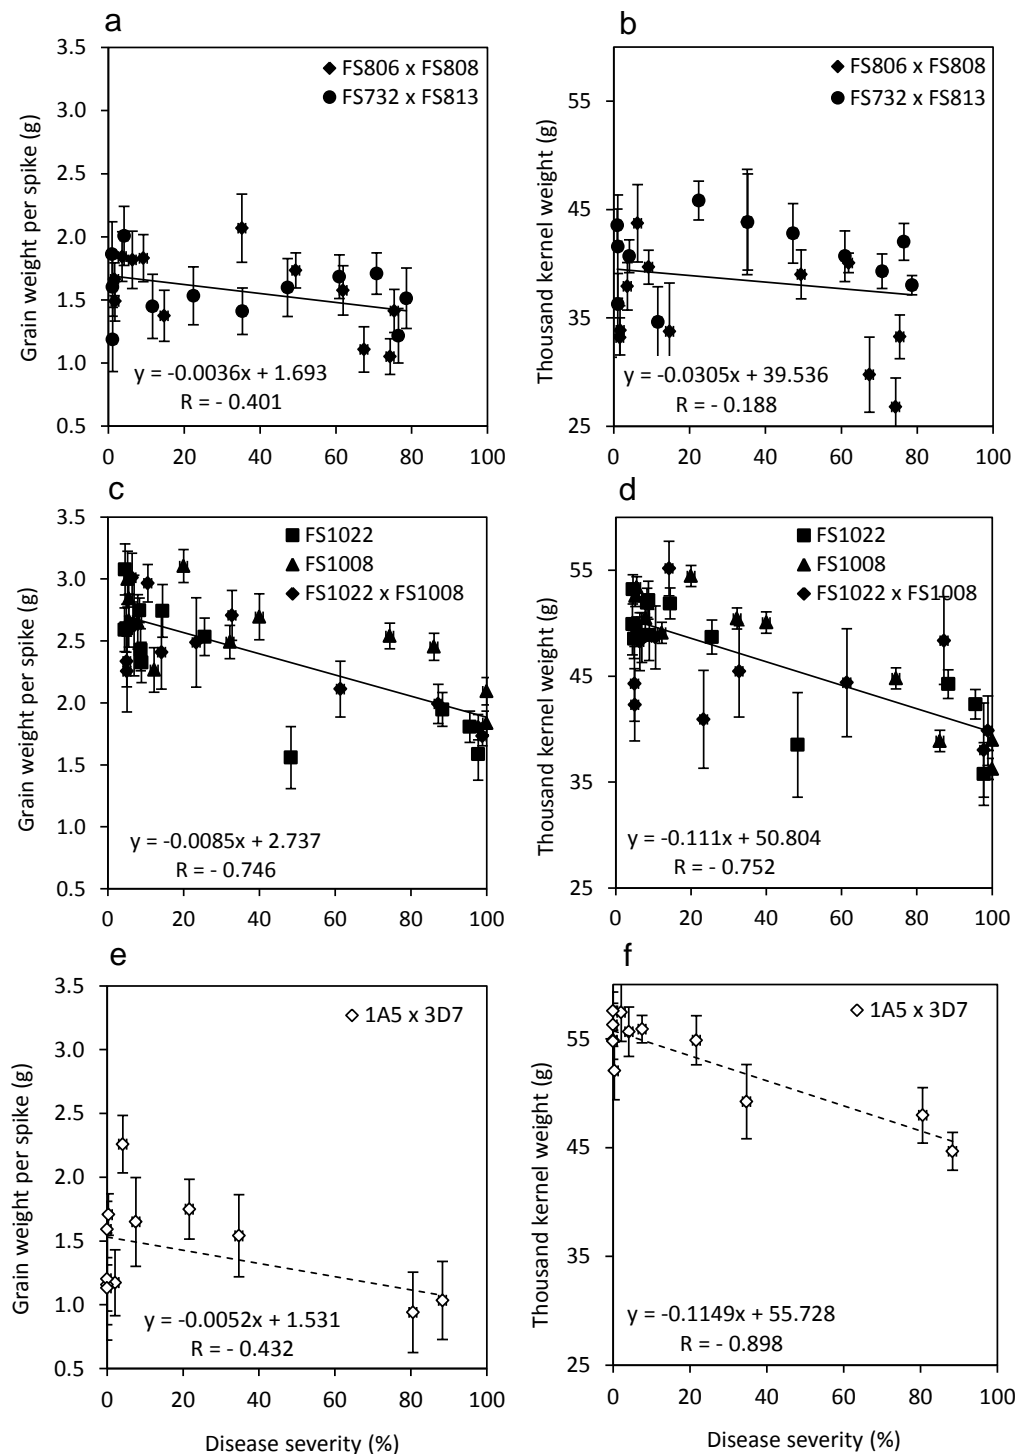

**Fig.7** Relationship between the mean severity of *Septoria tritici* blotch (percentage of necrotic area) and (a) density of pycnidia (number of pycnidia per cm<sup>2</sup>) or (b) percentage of pycnidia displaying exudation. Assessments were performed five weeks after the inoculation of adult wheat plants cv. Soissons with biparental suspensions of *Zymoseptoria tritici* isolates FS813 × FS732 (2016) and FS808 × FS806 (2016). Vertical bars represent the standard deviation. The Pearson correlation coefficient is given in brackets.

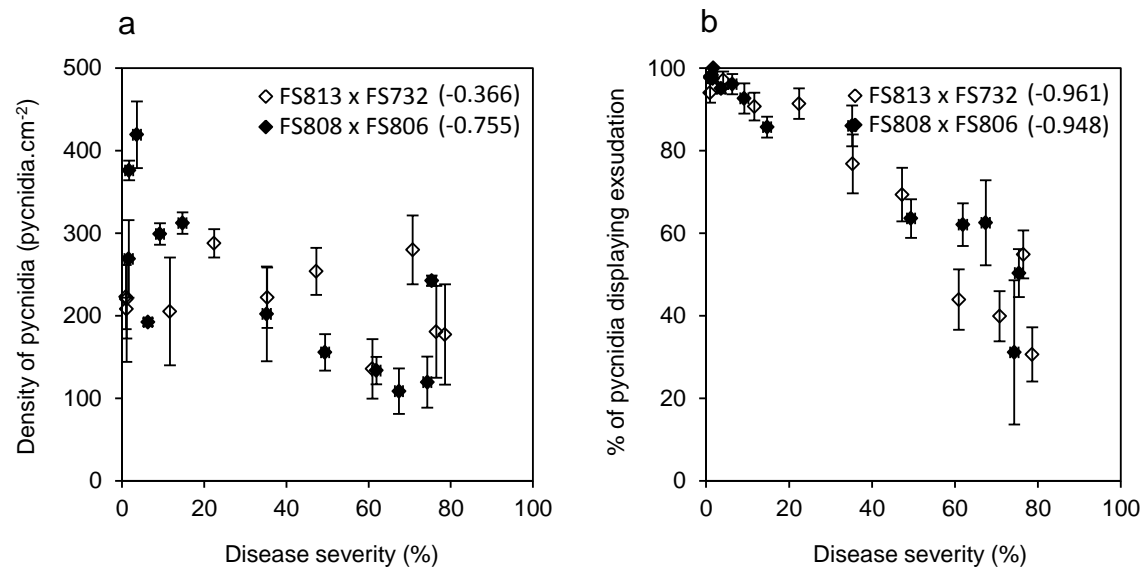

**Fig.8** Relationship between inoculum concentration of *Zymoseptoria tritici* FS1008 or FS1022 isolate (number of FS1008 or FS1022 conidia per mL) in suspension alone or mixed with a second isolate present in the same amount, and the mean severity of Septoria tritici blotch (percentage of necrotic area) estimated on the three uppermost leaves of adult wheat plants cv. Soissons. ANOVA was performed (see *P*-value) at each relevant inoculum concentration ( $5.10^2$ ,  $5.10^3$ ,  $5.10^4$ ,  $5.10^5$  and  $5.10^6$  conidia of each isolate per mL; see example  $5.10^5$  conidia of FS1008 in the scheme on the right). The number indicates the difference (in %) between the severity of the disease induced by FS1008 (the most aggressive isolate) inoculated alone and the severity of the disease induced by the FS1008 × FS1022 mixture (for the same number of FS1008 conidia); a negative percentage indicates that disease severity was lower after inoculation with the mixture; \* indicates that the difference is significant (post hoc multiple comparison).

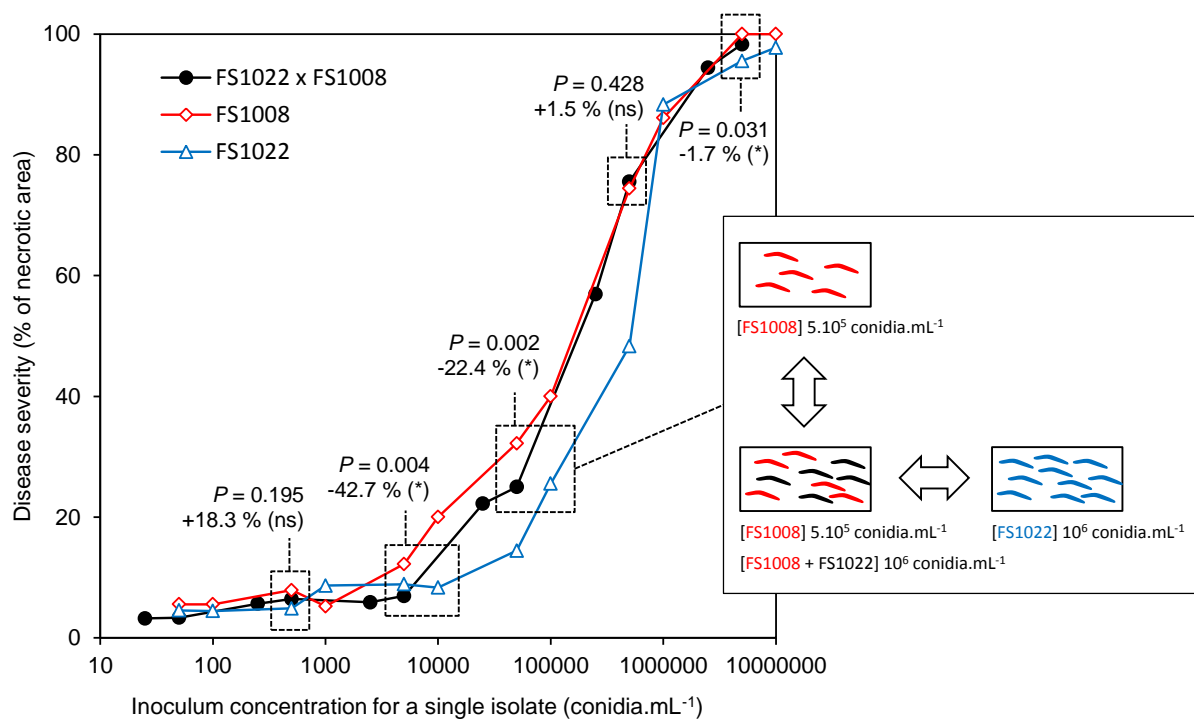

**Fig.9** Impact of inoculum concentration (total number of conidia per mL) on the intensity of sexual reproduction in *Zymoseptoria tritici* (number of ascospores per g of wheat debris). Inoculation with biparental suspensions of isolates (a) FS802 × FS1006 (2015), (b) FS813 × FS732 (2016), (c) FS808 × FS806 (2016), and (d) FS1022 × FS1008 (2017) were performed on cv. Soissons, and with (e) 3D7 × 1A5 (2017) on cv. Runal. Each bar corresponds to the cumulative number of ascospores collected per gram of wheat debris over four independent discharge events (rep1 to rep4). For each cross, Kruskal-Wallis test was performed and completed, when significant (see *P*-value), by a post hoc multiple comparison; letter indicates significant differences between inoculum concentrations; tests for FS802 × FS1006 (2015) were performed after exclusion of rep4 data (to avoid bias caused by the overall low amount of ascospores). The complete dataset is given in Table S1.

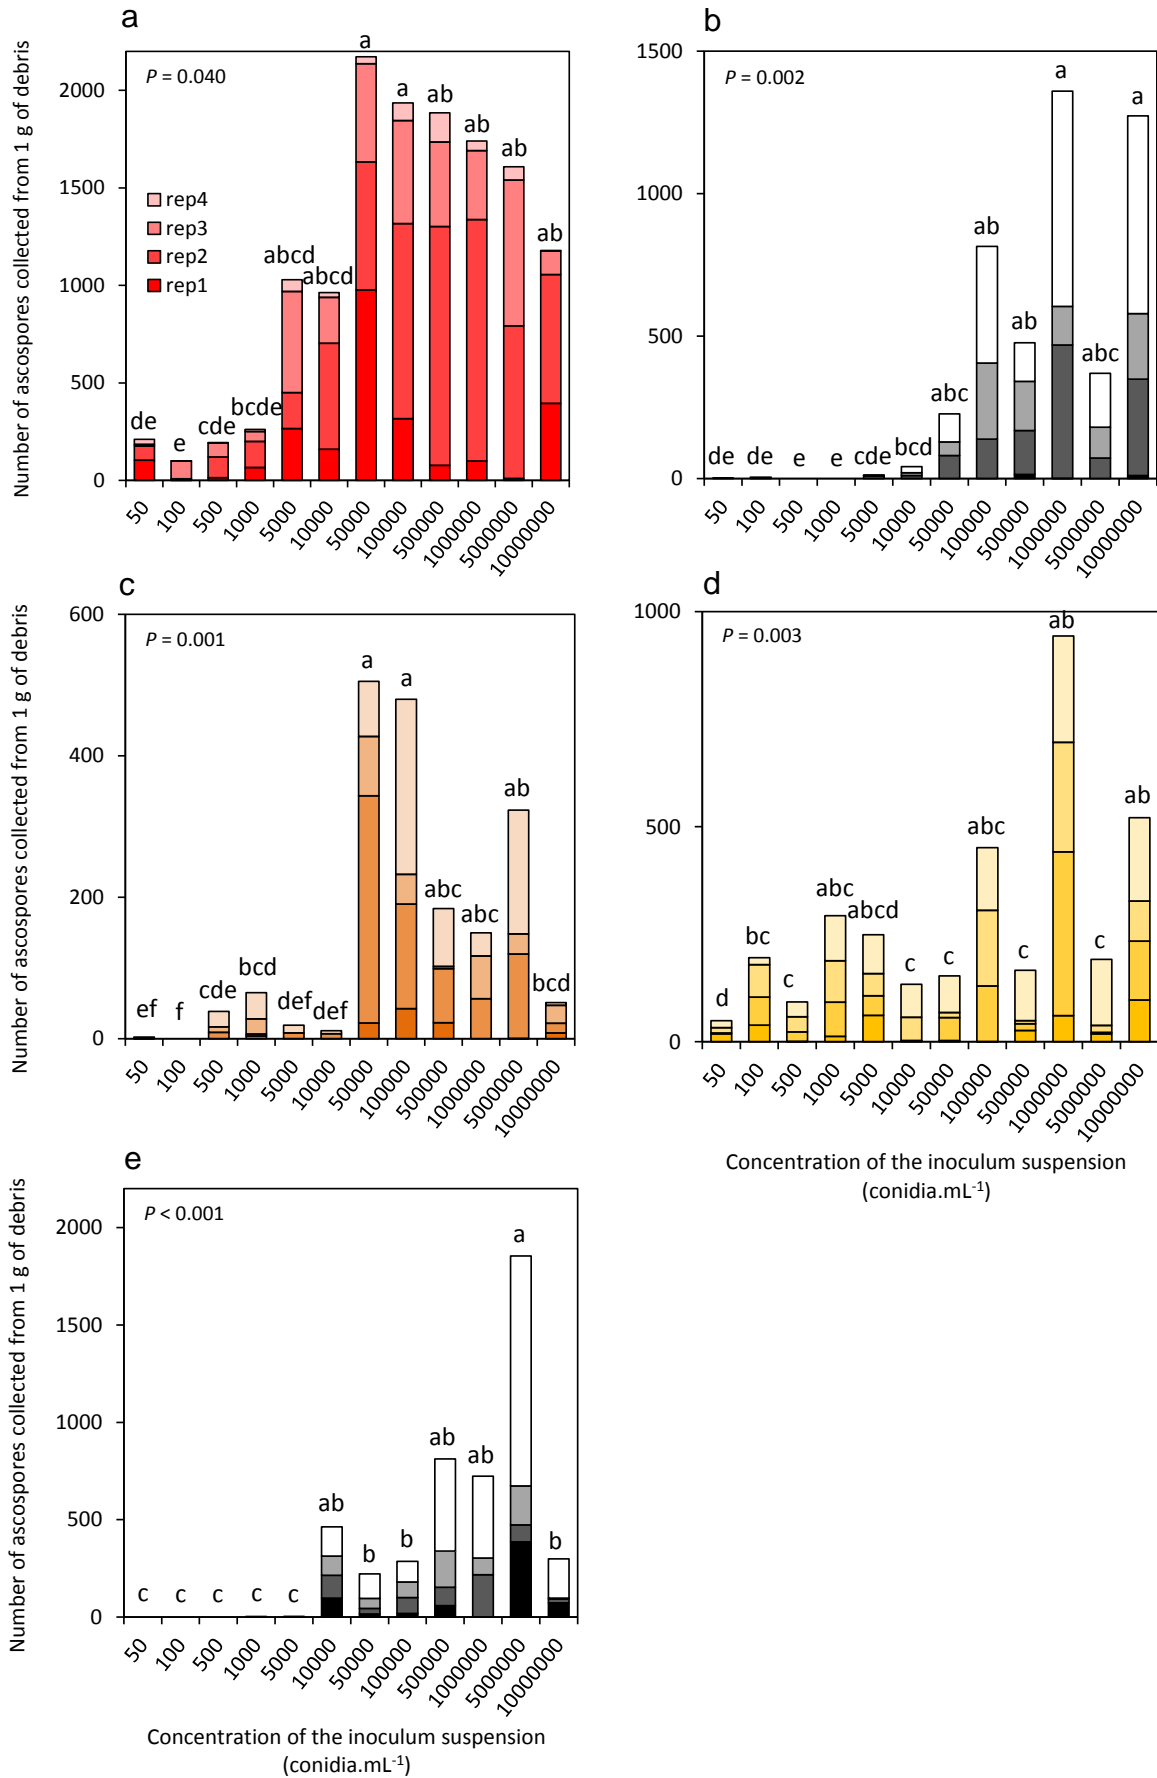

**Fig.10** Empirical relationship between asexual multiplication intensity in *Zymoseptoria tritici* (disease severity assessed as a percentage of necrotic area) and sexual reproduction intensity (normalized number of ascospores for each cross expressed in %). A quadratic model (dotted lines; see eq. 2 in Material & Methods) and a model integrating two density-dependent constraints (bold lines; see eq. 3) were adjusted on the data for three crosses (FS802 × FS1006 in red, FS808 × FS806 in orange, FS1022 × FS1008 in yellow) to visualize the different relationships. Convergence was not obtained for the other two crosses (white points).

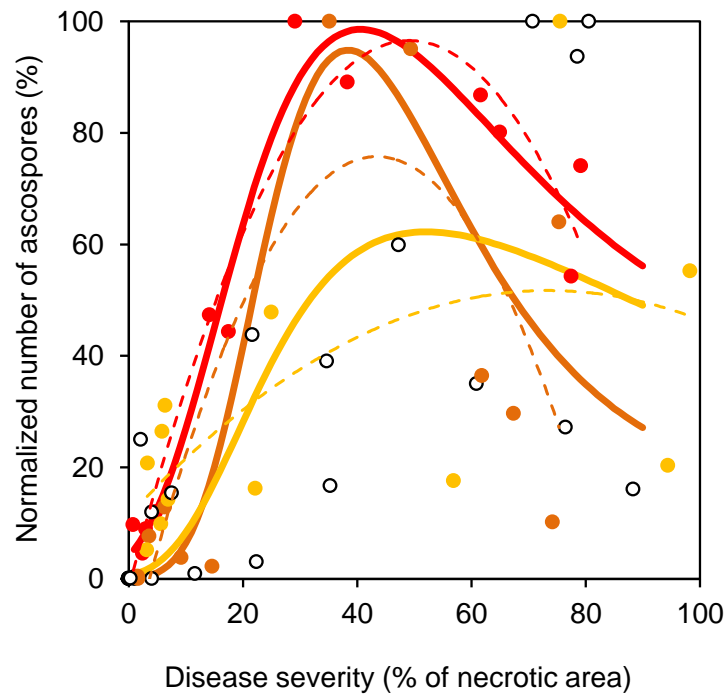

**Fig.11** Theoretical relationship between asexual multiplication intensity in *Zymoseptoria tritici* (disease severity assessed as a percentage of necrotic area) and sexual reproduction intensity (normalized number of ascospores produced per g of wheat tissue), assuming that the conidia of two compatible parental isolates were deposited in equal proportions on leaves. Grey areas represent the decrease in sexual reproduction intensity due to: (1) an Allee effect (difficulty finding the opposite mating type at low population densities); (2) induced resistance (activation of host defense mechanisms by one of the parental isolates, leading to a mating-type disequilibrium); (3) competition for host resource allocation between asexual multiplication and sexual reproduction. Sexual reproduction intensity is expected to be optimal for disease severities of 30 to 45%.

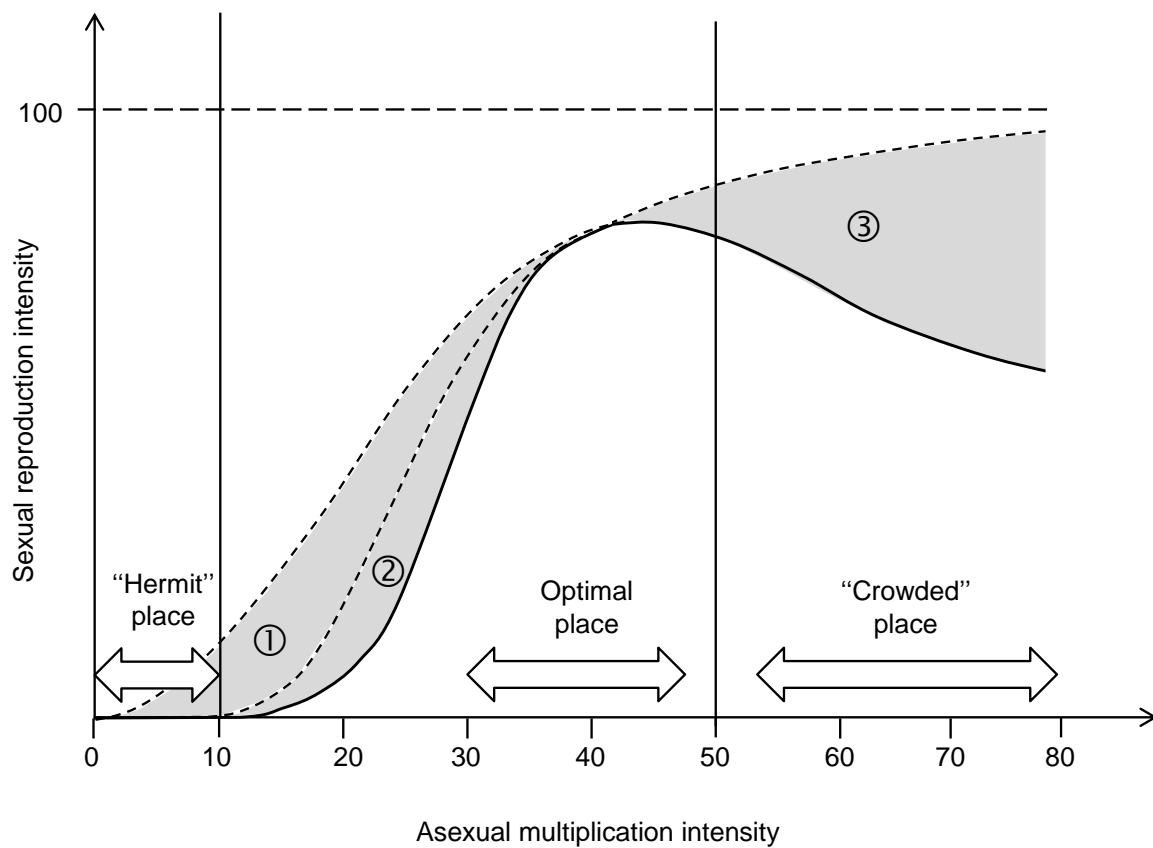

1



**Online Resource 2.** Number of *Zymoseptoria tritici* ascospores collected per gram of wheat debris during four independent discharge events for the five crosses (FS802 × FS1006, FS813 × FS732, FS808 × FS806, FS1022 × FS1008, 3D7 × 1A5) performed with 12 inoculum concentrations.

| FS802 × FS1006 on wheat cv. Soissons (2015) |                               |                                                        |            |            |            |   |        |
|---------------------------------------------|-------------------------------|--------------------------------------------------------|------------|------------|------------|---|--------|
| Inoculum concentration <sup>1</sup>         | Disease severity <sup>2</sup> | Mean number of ascospores collected per gram of debris |            |            |            |   |        |
| Date                                        | 05-02-2015                    | 11-12-2015                                             | 11-19-2015 | 12-03-2015 | 01-21-2016 | - | Total  |
| 50                                          | 0.8 ± 0.3                     | 103.2                                                  | 72.5       | 7.9        | 26.6       |   | 210.2  |
| 10 <sup>2</sup>                             | 2.5 ± 0.6                     | 0.3                                                    | 7.5        | 91.2       | 0.3        |   | 99.2   |
| 5 × 10 <sup>2</sup>                         | 3.0 ± 0.5                     | 13.5                                                   | 105.6      | 71.5       | 3.7        |   | 194.3  |
| 10 <sup>3</sup>                             | 4.8 ± 1.3                     | 66.4                                                   | 132.9      | 51.2       | 11.4       |   | 261.9  |
| 5 × 10 <sup>3</sup>                         | 14.2 ± 2.2                    | 265.0                                                  | 184.6      | 518.7      | 60.9       |   | 1029.1 |
| 10 <sup>4</sup>                             | 17.5 ± 3.5                    | 159.2                                                  | 543.2      | 236.3      | 24.6       |   | 963.3  |
| 5 × 10 <sup>4</sup>                         | 29.2 ± 3.4                    | 976.8                                                  | 656.1      | 504.4      | 35.5       |   | 2172.7 |
| 10 <sup>5</sup>                             | 38.3 ± 4.7                    | 316.2                                                  | 999.9      | 529.3      | 90.8       |   | 1936.1 |
| 5 × 10 <sup>5</sup>                         | 61.7 ± 3.1                    | 76.3                                                   | 1225.2     | 433.8      | 150.0      |   | 1885.2 |
| 10 <sup>6</sup>                             | 65.0 ± 4.6                    | 98.7                                                   | 1238.5     | 353.6      | 49.9       |   | 1740.7 |
| 5 × 10 <sup>6</sup>                         | 79.2 ± 4.2                    | 10.1                                                   | 781.8      | 747.6      | 69.3       |   | 1608.8 |
| 10 <sup>7</sup>                             | 77.5 ± 4.9                    | 395.0                                                  | 660.1      | 120.6      | 3.1        |   | 1178.7 |

<sup>1</sup> total number of conidia per mL

<sup>2</sup> percentage of necrotic area ± standard deviation

| FS813 × FS732 on wheat cv. Soissons (2016) |                               |                                                        |            |            |            |            |        |
|--------------------------------------------|-------------------------------|--------------------------------------------------------|------------|------------|------------|------------|--------|
| Inoculum concentration <sup>1</sup>        | Disease severity <sup>2</sup> | Mean number of ascospores collected per gram of debris |            |            |            |            |        |
| Date                                       | 05-06-2016                    | 11-17-2016                                             | 01-19-2017 | 02-15-2017 | 03-01-2017 | 03-15-2017 | Total  |
| 50                                         | 1.1 ± 0.4                     | 0.0                                                    | 0.0        | 2.0        | 0.0        | 0.0        | 2.0    |
| 10 <sup>2</sup>                            | 1.0 ± 0.5                     | 0.0                                                    | 0.0        | 0.0        | 4.5        | 0.0        | 4.5    |
| 5 × 10 <sup>2</sup>                        | 0.9 ± 0.3                     | 0.0                                                    | 0.0        | 0.0        | 0.0        | 0.0        | 0.0    |
| 10 <sup>3</sup>                            | 1.6 ± 0.4                     | 0.0                                                    | 0.0        | 0.0        | 0.0        | 0.0        | 0.0    |
| 5 × 10 <sup>3</sup>                        | 9.3 ± 2.0                     | 0.0                                                    | 0.0        | 9.6        | 0.2        | 2.9        | 12.7   |
| 10 <sup>4</sup>                            | 17.1 ± 2.6                    | 0.0                                                    | 0.0        | 10.6       | 10.0       | 21.2       | 41.8   |
| 5 × 10 <sup>4</sup>                        | 33.3 ± 2.1                    | 0.0                                                    | 0.0        | 80.6       | 47.8       | 98.5       | 227.0  |
| 10 <sup>5</sup>                            | 41.3 ± 3.8                    | 0.0                                                    | 0.0        | 138.8      | 266.9      | 409.0      | 814.7  |
| 5 × 10 <sup>5</sup>                        | 57.2 ± 3.7                    | 0.0                                                    | 14.4       | 154.7      | 172.4      | 134.8      | 476.3  |
| 10 <sup>6</sup>                            | 67.8 ± 1.7                    | 0.0                                                    | 0.7        | 467.9      | 135.4      | 755.9      | 1360.0 |
| 5 × 10 <sup>6</sup>                        | 75.6 ± 1.5                    | 0.0                                                    | 0.0        | 72.2       | 108.1      | 189.6      | 369.9  |
| 10 <sup>7</sup>                            | 78.3 ± 2.4                    | 0.0                                                    | 10.6       | 338.2      | 230.3      | 694.5      | 1273.7 |

<sup>1</sup> total number of conidia per mL

<sup>2</sup> percentage of necrotic area ± standard deviation

| FS808 × FS806 on wheat cv. Soissons (2016) |                               |                                                        |            |            |            |            |       |
|--------------------------------------------|-------------------------------|--------------------------------------------------------|------------|------------|------------|------------|-------|
| Inoculum concentration <sup>1</sup>        | Disease severity <sup>2</sup> | Mean number of ascospores collected per gram of debris |            |            |            |            |       |
| Date                                       | 05-06-2016                    | 11-17-2016                                             | 01-19-2017 | 02-15-2017 | 03-01-2017 | 03-15-2017 | Total |
| 50                                         | 1.6 ± 0.3                     | 0.0                                                    | 0.0        | 0.2        | 2.1        | 0.0        | 2.3   |
| 10 <sup>2</sup>                            | 1.4 ± 0.3                     | 0.0                                                    | 0.0        | 0.0        | 0.0        | 0.0        | 0.0   |
| 5 × 10 <sup>2</sup>                        | 2.8 ± 0.7                     | 0.0                                                    | 0.0        | 9.0        | 7.6        | 21.9       | 38.5  |
| 10 <sup>3</sup>                            | 5.9 ± 1.5                     | 0.0                                                    | 4.1        | 2.6        | 21.5       | 36.9       | 65.0  |
| 5 × 10 <sup>3</sup>                        | 7.3 ± 1.5                     | 0.0                                                    | 0.0        | 8.1        | 0.0        | 11.1       | 19.2  |
| 10 <sup>4</sup>                            | 9.8 ± 2.6                     | 0.0                                                    | 0.0        | 6.9        | 0.0        | 4.2        | 11.2  |
| 5 × 10 <sup>4</sup>                        | 28.9 ± 2.6                    | 0.0                                                    | 22.2       | 321.2      | 83.9       | 78.0       | 505.3 |
| 10 <sup>5</sup>                            | 43.9 ± 3.1                    | 0.0                                                    | 42.6       | 147.7      | 42.3       | 247.6      | 480.2 |
| 5 × 10 <sup>5</sup>                        | 60.0 ± 2.9                    | 0.0                                                    | 22.7       | 76.5       | 3.1        | 81.8       | 184.0 |
| 10 <sup>6</sup>                            | 65.0 ± 3.3                    | 0.0                                                    | 0.0        | 56.7       | 60.2       | 32.8       | 149.7 |
| 5 × 10 <sup>6</sup>                        | 75.6 ± 1.6                    | 0.0                                                    | 0.6        | 119.2      | 28.3       | 175.4      | 323.5 |
| 10 <sup>7</sup>                            | 74.4 ± 2.2                    | 0.0                                                    | 8.2        | 13.6       | 25.5       | 4.0        | 51.2  |

<sup>1</sup> total number of conidia per mL

<sup>2</sup> percentage of necrotic area ± standard deviation

| FS1022 × FS1008 on wheat cv. Soissons (2017) |                               |                                                        |            |            |            |            |       |
|----------------------------------------------|-------------------------------|--------------------------------------------------------|------------|------------|------------|------------|-------|
| Inoculum concentration <sup>1</sup>          | Disease severity <sup>2</sup> | Mean number of ascospores collected per gram of debris |            |            |            |            |       |
| Date                                         | 05-27-2017                    | 11-09-2017                                             | 12-07-2017 | 01-04-2017 | 01-01-2018 | 01-24-2018 | Total |
| 50                                           | 3.2 ± 0.2                     | 0.0                                                    | 18.3       | 1.7        | 12.7       | 16.1       | 48.8  |
| 10 <sup>2</sup>                              | 3.3 ± 0.2                     | 0.0                                                    | 38.8       | 64.6       | 75.6       | 16.8       | 195.7 |
| 5 × 10 <sup>2</sup>                          | 5.7 ± 0.5                     | 0.0                                                    | 0.9        | 22.0       | 35.0       | 34.8       | 92.8  |
| 10 <sup>3</sup>                              | 6.4 ± 0.7                     | 0.0                                                    | 12.5       | 79.2       | 96.6       | 104.8      | 293.1 |
| 5 × 10 <sup>3</sup>                          | 5.9 ± 0.5                     | 0.0                                                    | 61.2       | 45.5       | 51.4       | 90.9       | 249.0 |
| 10 <sup>4</sup>                              | 6.9 ± 1.2                     | 0.0                                                    | 2.2        | 0.4        | 54.2       | 77.0       | 133.8 |
| 5 × 10 <sup>4</sup>                          | 22.2 ± 2.2                    | 0.0                                                    | 2.8        | 53.6       | 11.6       | 84.9       | 152.8 |
| 10 <sup>5</sup>                              | 25.0 ± 2.4                    | 0.0                                                    | 0.1        | 129.5      | 176.1      | 145.6      | 451.3 |
| 5 × 10 <sup>5</sup>                          | 56.9 ± 3.6                    | 0.0                                                    | 26.2       | 15.5       | 7.3        | 117.0      | 166.0 |
| 10 <sup>6</sup>                              | 75.6 ± 5.0                    | 0.0                                                    | 60.6       | 381.1      | 254.4      | 247.5      | 943.6 |
| 5 × 10 <sup>6</sup>                          | 94.4 ± 0.4                    | 0.0                                                    | 18.4       | 3.2        | 16.3       | 153.5      | 191.4 |
| 10 <sup>7</sup>                              | 98.3                          | 0.0                                                    | 97.3       | 136.4      | 92.9       | 194.3      | 521.0 |

<sup>1</sup> total number of conidia per mL

<sup>2</sup> percentage of necrotic area ± standard deviation

| 3D7 × 1A5 on wheat cv. Runal (2017) |                               |                                                   |            |            |            |            |        |
|-------------------------------------|-------------------------------|---------------------------------------------------|------------|------------|------------|------------|--------|
| Inoculum concentration <sup>1</sup> | Disease severity <sup>2</sup> | Number of ascospores collected per gram of debris |            |            |            |            |        |
| Date                                | 05-27-2017                    | 11-09-2017                                        | 12-07-2017 | 01-04-2017 | 01-01-2018 | 01-24-2018 | Total  |
| 50                                  | 0.0                           | 0.0                                               | 0.0        | 0.0        | 0.0        | 0.0        | 0.0    |
| 10 <sup>2</sup>                     | 0.0                           | 0.0                                               | 0.0        | 0.0        | 0.0        | 0.0        | 0.0    |
| 5 × 10 <sup>2</sup>                 | 0.0                           | 0.0                                               | 0.0        | 0.0        | 0.0        | 0.0        | 0.0    |
| 10 <sup>3</sup>                     | 0.0                           | 0.0                                               | 0.0        | 0.0        | 0.0        | 2.2        | 2.2    |
| 5 × 10 <sup>3</sup>                 | 0.3 ± 0.1                     | 0.0                                               | 0.0        | 1.4        | 0.0        | 0.2        | 1.6    |
| 10 <sup>4</sup>                     | 2.1 ± 0.3                     | 0.0                                               | 97.6       | 117.2      | 98.0       | 150.2      | 463.0  |
| 5 × 10 <sup>4</sup>                 | 4.1 ± 0.2                     | 0.0                                               | 15.5       | 29.5       | 51.4       | 124.8      | 221.2  |
| 10 <sup>5</sup>                     | 7.6 ± 0.3                     | 0.0                                               | 19.2       | 81.0       | 79.5       | 106.2      | 286.0  |
| 5 × 10 <sup>5</sup>                 | 21.7 ± 0.7                    | 0.0                                               | 58.4       | 95.0       | 185.0      | 473.8      | 812.1  |
| 10 <sup>6</sup>                     | 34.7 ± 2.8                    | 0.0                                               | 0.0        | 217.4      | 85.8       | 420.5      | 723.7  |
| 5 × 10 <sup>6</sup>                 | 80.6 ± 0.4                    | 0.0                                               | 386.2      | 87.5       | 200.2      | 1181.4     | 1855.3 |
| 10 <sup>7</sup>                     | 88.3 ± 1.8                    | 0.0                                               | 73.2       | 19.6       | 4.2        | 201.5      | 298.5  |

<sup>1</sup> total number of conidia per mL

<sup>2</sup> percentage of necrotic area ± standard deviation

**Online Resource 2.** (a) Spatiotemporal dynamics of *Zymoseptoria tritici* sexual reproduction in standing stubble left in the field during the fall, over three interepidemic periods (2015-2016, 2016-2017, 2017-2018). (b, c, d) Impact of the vertical position of wheat tissues (stems and leaves, from lower to upper layers: 0-5 cm, 5-10 cm, 10-15 cm, 15-25 cm, 25-35 cm, 35-50 cm, 50-65 cm) on the number of ascospores collected per gram of debris (logarithmic scale) on three or four sampling dates (from September to January) over the three interepidemic periods. The dotted lines indicate the standard error.

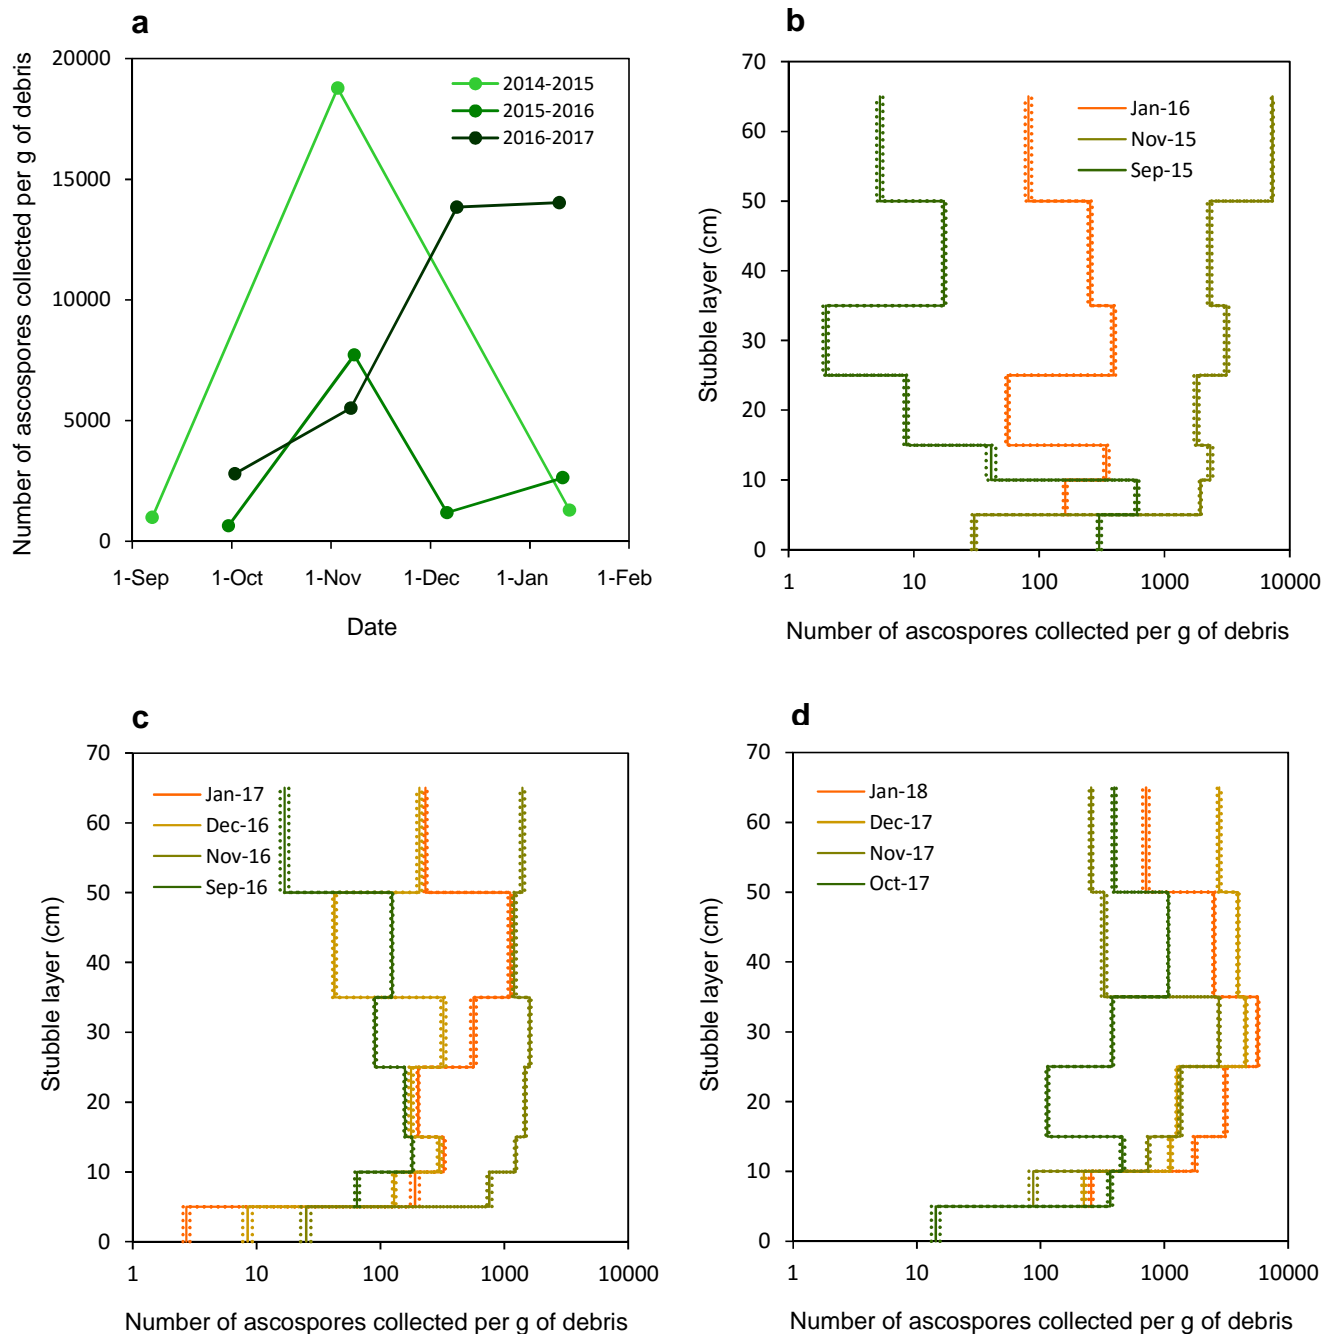

Source: https://www.biorxiv.org/content/10.1101/290072v2.full.pdf
